# Inefficient exploitation of accessory receptors reduces the sensitivity of chimeric antigen receptors

Jake Burton<sup>1</sup>, Jesús A. Siller-Farfán<sup>1¶</sup>, Johannes Pettmann<sup>1</sup>, Benjamin Salzer<sup>1†</sup>, Mikhail Kutuzov<sup>1</sup>, P. Anton van der Merwe<sup>1</sup>, Omer Dushek<sup>1¶</sup>

<sup>1</sup>Sir William Dunn School of Pathology, University of Oxford, OX1 3RE, Oxford, UK

<sup>†</sup>Present address: St. Anna Children's Cancer Research Institute (CCRI), 1090, Vienna, Austria

<sup>¶</sup>Corresponding authors

## Abstract

Chimeric antigen receptors (CARs) can re-direct T cells to target abnormal cells but their activity is limited by a profound defect in antigen sensitivity, the source of which remains unclear. Here we show that, while CARs have a >100-fold lower antigen sensitivity compared to the T cell receptor (TCR) when antigen is presented on antigen-presenting-cells (APCs), they have nearly identical sensitivity when antigen is presented as purified protein on artificial surfaces. We next measured the impact of engaging accessory receptors (CD2, LFA-1, CD28, CD27, 4-1BB) on antigen sensitivity by adding their purified ligands. Unexpectedly, we found that engaging CD2 or LFA-1 improved TCR antigen sensitivity by 125 and 22-fold, respectively, but only improved CAR sensitivity by <5-fold. This differential effect of CD2 and LFA-1 engagement on TCR versus CAR sensitivity was confirmed using APCs. We found that sensitivity to antigen can be partially restored by fusing the CAR variable domains to the TCR CD3 $\epsilon$  subunit (also known as a TRuC), and fully restored by exchanging the CAR variable domains with the TCR $\alpha\beta$  variable domains (also known as STAR or HIT). Importantly, these improvements in TRuC and STAR/HIT sensitivity can be predicted by their enhanced ability to exploit CD2 and LFA-1. These findings demonstrate that the CAR sensitivity defect is a result of their inefficient exploitation of accessory receptors, and suggest approaches to increase sensitivity.

## 1 Introduction

2 Adoptive cell transfer (ACT) of genetically engineered T cells expressing Chimeric Antigen Receptors  
3 (CARs) is a clinically approved cancer therapy for haematological malignancies (1, 2). CARs are synthetic  
4 receptors that are typically generated by the fusion of an antibody-derived, antigen-binding single-chain  
5 variable fragment (scFv) with intracellular signalling motifs from the cytoplasmic tails of the T cell receptor  
6 (TCR) complex. Although administration of CAR-T cells targeting the surface antigens CD19, CD20, and  
7 B cell maturation antigen (BCMA or CD269) on malignant B cells results in an excellent initial response,  
8 patients often relapse when malignant cells emerge with reduced levels of target antigens (3–8). One likely  
9 explanation for this escape is that CARs require 100 to 1000-fold higher antigen densities to induce T cell  
10 activation compared to the native TCR (9–11). The mechanism underlying this profound defect in antigen  
11 sensitivity, which is seen with both proximal (10, 11) and distal readouts of T cell activation (9), remains  
12 unclear.

13 One approach to improving CAR function has focused on varying the stalk/hinge region and/or the  
14 cytoplasmic signalling domains. There are several commonly used hinges, including from CD8a, CD28,  
15 and IgG1. Most CARs use the cytoplasmic domain of the TCR  $\zeta$ -chain for signalling, either alone (1<sup>st</sup>  
16 generation) or in combination with the CD28 or 4-1BB cytoplasmic signalling domains (2<sup>nd</sup> generation)  
17 (12–15). A study comparing the ability of several of these CARs to kill target cells with very low antigen  
18 densities found that the CARs that performed best had the CD28 hinge and the signalling domain from  
19  $\zeta$ -chain, either alone or in combination with the CD28 domain (16). Other studies have replaced the TCR  
20  $\zeta$ -chain with the cytoplasmic chain of the CD3 $\epsilon$  subunit of the TCR/CD3 complex (11, 17, 18).

21 A second approach to improving CAR function has focused on exploiting all the signalling domains  
22 present in the TCR/CD3 complex. For example, eTruC receptors fuse the scFv directly to the extracellular  
23 domain of CD3 $\epsilon$  (19) whereas STARs (also called HIT receptors) replace the variable domains of the TCR  
24 with the scFv variable domains (20, 21). Using a xenograft carcinoma model with EGFR as the target antigen  
25 a STAR outperformed an eTruC, and both outperformed CARs (20). The precise mechanisms underlying  
26 these performance differences are unclear.

27 The TCR is known to have remarkable antigen sensitivity; it is able to recognise even a single peptide  
28 major-histocompatibility-complex (pMHC) on cells (22). Diverse mechanisms have been shown to con-  
29 tribute to this sensitivity (23). These include having multiple immunoreceptor tyrosine-based activation  
30 motifs (ITAMs) (24, 25), using the TCR co-receptors CD4 or CD8 (26, 27), and exploiting TCR acces-  
31 sory receptors such as LFA-1 (28) and CD2 (29). Despite the known importance of accessory receptors in  
32 enhancing TCR antigen sensitivity, their contribution to CAR antigen sensitivity has not been measured.  
33 Interestingly, CD2 has been shown to affect T cell activation by 1<sup>st</sup> generation CARs but its impact on CAR  
34 antigen sensitivity is presented unknown (30).

35 Here, we take advantage of a shared pMHC antigen ligand to directly compared the antigen sensitivity  
36 of CARs with the native TCR. We show that, while CARs exhibit a >100-fold lower antigen sensitivity  
37 than TCRs to antigen presented on cells, they exhibit nearly identical sensitivities to antigen in the absence  
38 of accessory receptor ligands. We then demonstrate that engagement of accessory receptors only modestly  
39 increases the sensitivity of CARs to antigen, despite dramatically enhancing the sensitivity of the TCR.  
40 Finally, we show that TruCs and STARs/HITs have greater antigen sensitivity than CARs, and that this  
41 correlates with their ability to exploit CD2 to enhance this sensitivity. Our work helps explain the profound  
42 defect in CAR sensitivity and suggests ways to improve it for therapeutic purposes.

## 43 Results

### 44 Standard CAR designs exhibit reduced sensitivity compared to the TCR when antigen is 45 presented on APCs but not when presented in isolation

46 To compare the antigen sensitivity of TCRs and CARs, we utilised the C9V variant (9V) of the NY-ESO-  
47 1<sub>157-165</sub> cancer testis peptide antigen expressed on HLA-A\*02:01, because it is recognised by both the 1G4  
48 TCR (31, 32) and the D52N scFv (33) (Fig. 1A). While D52N binds to pMHC in a similar orientation  
49 to the 1G4 TCR (34), it binds 9V pMHC with a higher affinity (33). We produced five CAR designs by  
50 fusing the D52N scFv to either the CD28, CD8a, or IgG1 hinge coupled to either the TCR  $\zeta$ -chain alone (1<sup>st</sup>  
51 generation) or in combination with the CD28 signalling chain (2<sup>nd</sup> generation) (Fig. S1).

52 Using a standard protocol similar to those employed in ACT (35), we transduced primary human CD8<sup>+</sup>  
53 T cells with each antigen receptor and expanded them *in vitro* before co-culturing them with the HLA-  
54 A\*02:01+ T2 target cell line pulsed with different concentration of antigen (Fig. 1B). We found that T cells  
55 expressing the 1G4 TCR were able to kill target cells (as measured by LDH release) at 300 to 7600-fold  
56 lower concentration of peptide antigen compared to CARs (Fig. 1C). We observed similar results when  
57 measuring the upregulation of the CD69 activation marker, albeit with lower 46 to 2800-fold changes (Fig.  
58 1D). The large antigen sensitivity differences between the TCR and CARs could not readily be explained by  
59 receptor surface expression because the CARs were expressed at the same (or higher) levels than the TCR, as  
60 measured by pMHC tetramer binding (Fig. S2). This >100-fold higher sensitivity of the TCR is consistent  
61 with two previous reports (9, 10) that utilised different hinges and different signalling chains (2<sup>nd</sup> generation  
62 CARs with 4-1BB coupled to the  $\zeta$ -chain). Our finding that a CAR with the CD28 hinge had the highest  
63 antigen sensitivity is also consistent with a previous report (16). Taken together, these results validate our  
64 antigen receptor system and suggest that reduced antigen sensitivity is a general feature of CARs.

65 We next compared antigen sensitivity of TCR and CARs when presented with plate immunobilized  
66 pMHC (Fig. 1E). This reductionist system allows precise control of TCR and accessory receptor ligands  
67 (32, 36–39). In striking contrast to the >100-fold difference in sensitivity when antigen was presented on  
68 cells, the TCR and CARs displayed similar antigen sensitivities when recognising purified antigen, with the  
69 largest difference being 3.5-fold (Fig. 1E).

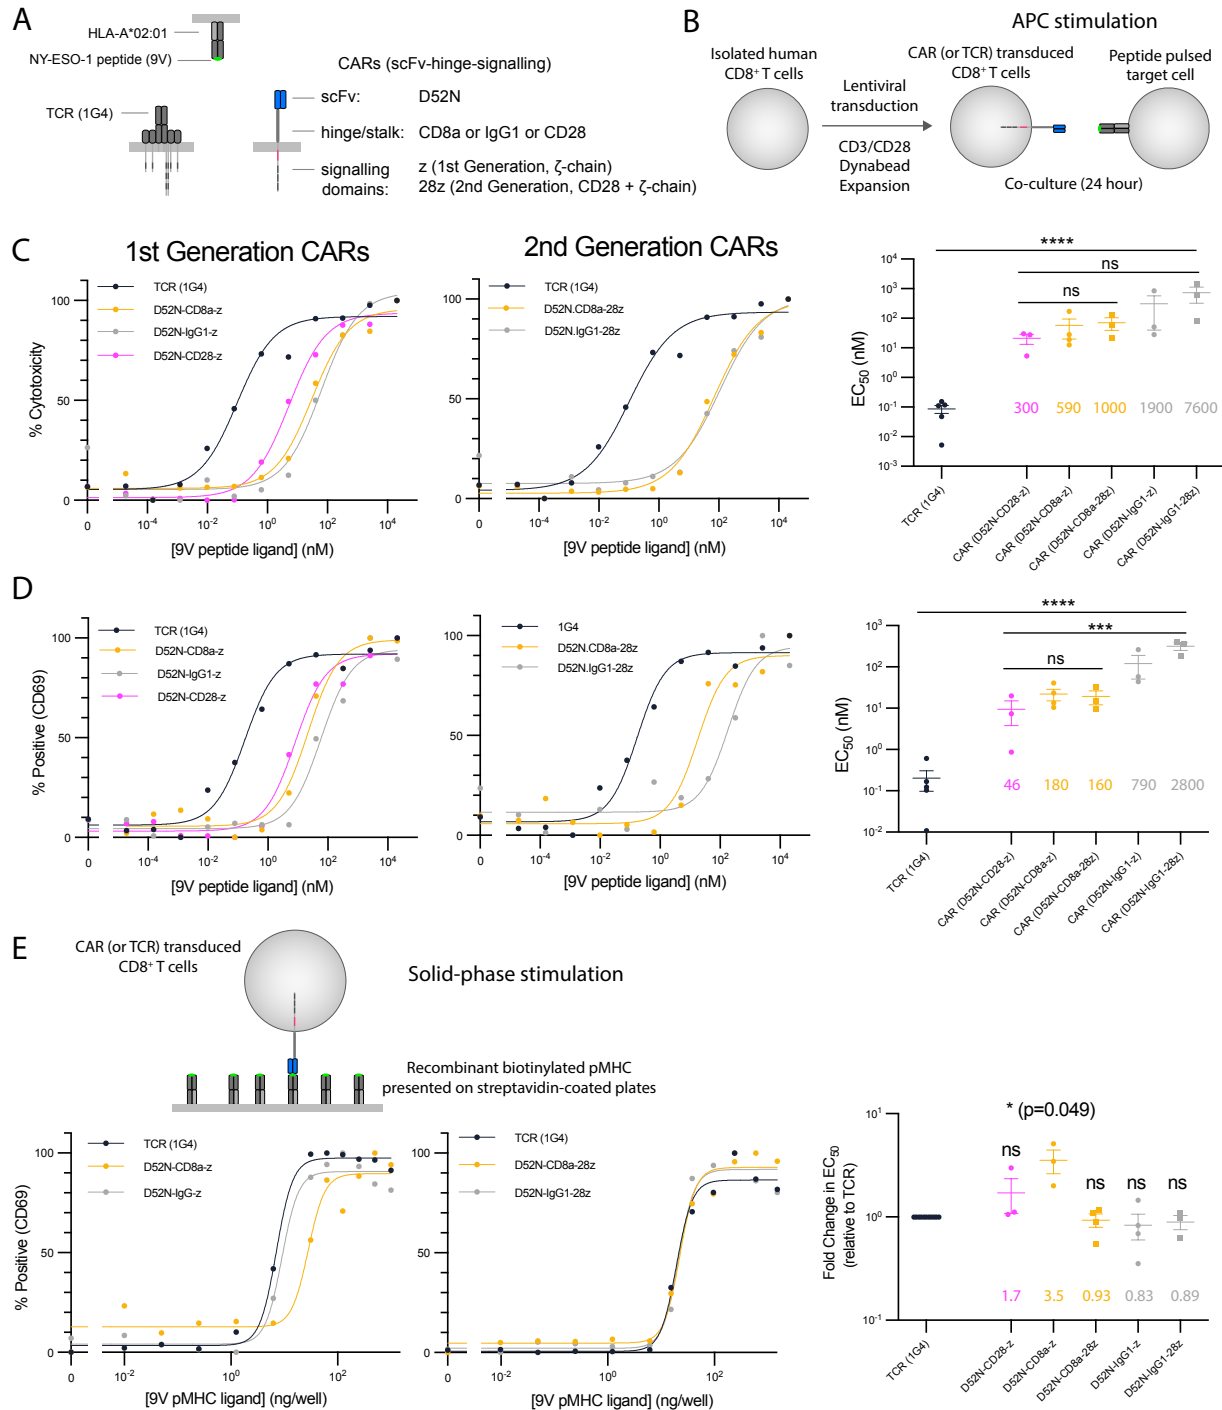

**Figure 1: CARs show reduced sensitivity compared to the TCR when antigen is presented on APCs but not when presented as purified protein.** (A) Schematic of antigen receptors. The 1G4 TCR and the D52N scFv both recognise the 9V NY-ESO-1 peptide antigen presented on HLA-A\*02:01. CARs using the CD8a hinge contain the CD8a transmembrane domain whereas CARs using the IgG1 or CD28 hinges contain the CD28 transmembrane domain. (B) Schematic of APC stimulation system. (C-D) Representative dose-response showing (C) cytotoxicity by LDH release and (D) surface expression of CD69 for the TCR and the indicated CARs along with EC<sub>50</sub> values from at least 3 independent experiments determined by fitting a Hill function to each dose-response curve. (E) Representative dose-response when purified biotinylated 9V pMHC ligand is presented on streptavidin-coated plates (left two plots) and EC<sub>50</sub> values from at least 3 independent experiments (right). The EC<sub>50</sub> values are compared using (C,D) one-way ANOVA or (E) one-sample t-test for a hypothetical mean of 1.0 on log-transformed values. Abbreviations: \* = p-value ≤ 0.05, \*\* = p-value ≤ 0.01, \*\*\* = p-value ≤ 0.001, \*\*\*\* = p-value ≤ 0.0001.

## 70 **Ligands to the adhesion receptors CD2 and LFA-1 increase the antigen sensitivity difference** 71 **between the TCR and CARs**

72 Our finding that the  $\geq 100$ -fold higher sensitivity of TCR compared to CARs is eliminated in a reductionist  
73 system provided an opportunity to explore the underlying mechanism. A key difference between cells and  
74 our reduced system is the presence of accessory receptor/ligand interactions involving T cell accessory  
75 receptors CD2, LFA-1, CD28, CD27, and 4-1BB (Fig. 2A). To investigate whether engagement of these  
76 receptors can account for the sensitivity differences, we tested their ability to increase antigen sensitivity by  
77 including, alongside pMHC, purified forms of their ligands at a concentration of (250 ng/well) previously  
78 shown to enhance T cell responses (32, 38, 40).

79 While ligands for CD2 (CD58), LFA-1 (ICAM-1), CD28 (CD86), CD27 (CD70), and 4-1BB (4-1BBL)  
80 all enhanced TCR antigen sensitivity, only CD58 and ICAM-1 increased CAR sensitivity (Fig. 2B-D). CD58  
81 and ICAM-1 produced the largest increases in TCR antigen sensitivity (125- and 22-fold, respectively),  
82 while CD86, CD70, and 4-1BBL produced much smaller increases (Fig. 2D). Strikingly, CARs were much  
83 less efficient at exploiting these ligands than the TCR, with only CD58 and ICAM-1 increasing sensitivity,  
84 and only by 1.4 to 4.7 fold (Fig. 2D). When performing independent experiments (Fig. 2D, individual  
85 EC<sub>50</sub> values), we isolated and transduced T cells from each donor with the TCR and one or more CARs. By  
86 always including the TCR, we could express the antigen sensitivity of all CARs relative to the TCR (Fig. 2E).  
87 This confirmed that the TCR and CARs were similarly sensitive when stimulated with only pMHC, while  
88 the TCR was more sensitive when ligands to accessory receptors were present, with the largest differences  
89 observed when including ligands to CD2 or LFA-1.

90 To confirm these findings with another readout of T cell activation we measured production of the  
91 inflammatory cytokine IFN $\gamma$ . As observed when using CD69 upregulation as a readout, accessory receptor  
92 ligands increased TCR sensitivity much more than CAR sensitivity, with CD2 ligands producing the biggest  
93 increases (Fig. S3).

94 It has previously been reported that tonic signalling by CARs can lead to T cell dysfunction/exhaustion  
95 by various mechanisms, including altering the expression of surface receptors (41–43), raising the possibility  
96 that tonic CAR signalling abrogates antigen sensitivity. To investigate this we first measure expression levels  
97 of accessory receptors (Fig. S4A) and exhaustion markers LAG-3, PD-1 and TIM-3 (Fig. S4B). These were  
98 indistinguishable between TCR and CAR-transduced T cells, except for a  $< 2$ -fold increase in TIM-3. Next,  
99 we showed that transduction of a CAR did not affect the sensitivity of an orthogonal TCR recognising a  
100 viral peptide, with or without the CD2 ligand (Fig. S4C). This ruled out tonic signalling as an explanation  
101 for the defect on CAR antigen sensitivity.

102 Supra-physiological affinities can impair TCR signalling and reduce antigen sensitivity (37, 44, 45) and  
103 lowering the affinity of CARs has been shown to improve their *in vivo* activity (46). It follows that the higher  
104 affinity of the D52N scFv than the 1G4 TCR for the 9V ( $\sim 50$ -fold higher at 37°C, Fig. S5A) could account  
105 for the defect in CAR sensitivity. To investigate this we identified a lower-affinity pMHC that bound the  
106 D52N scFv with the same affinity that the 1G4 TCR binds the 9V pMHC (Fig. S5A; 4A pMHC). When  
107 using these matched affinity pMHC antigens the difference in antigen sensitivity between the TCR- and  
108 CAR-transduced T cells was increased rather than decreased (Fig. S5B-E), demonstrating that the higher  
109 affinity of the CAR for antigen cannot account for its lower sensitivity.

110 The CD8 co-receptor binds pMHC, raising the possibility that it contributes to the difference in TCR  
111 and CAR sensitivity for pMHC antigen. To investigate this, we repeated the solid-phase stimulation assay

112 using a pMHC variant with point mutations that abolish CD8 binding (47) (Fig. S6). Eliminating CD8  
113 binding had no impact on the CAR sensitivity to pMHC and only a modest impact on antigen sensitivity  
114 to 9V pMHC. Interestingly, eliminating CD8 binding abolished TCR recognition of a very low-affinity 4A  
115 pMHC, consistent with previous work showing that CD8 has disproportionate impact on recognition of low-  
116 affinity antigens by TCR (48, 49). These findings show that CD8 binding does not account for the profound  
117 difference on CAR and TCR sensitivity.

118 In summary, the antigen sensitivities of the TCR and CARs are similar when presented with purified  
119 antigen in isolation, and antigen sensitivity of the TCR is enhanced far more than CARs by when including  
120 ligands for accessory receptors, especially CD2. This difference in TCR and CAR antigen sensitivity is not  
121 a result of differences in tonic-signalling, affinity for antigen, or the contribution of the CD8 co-receptor.

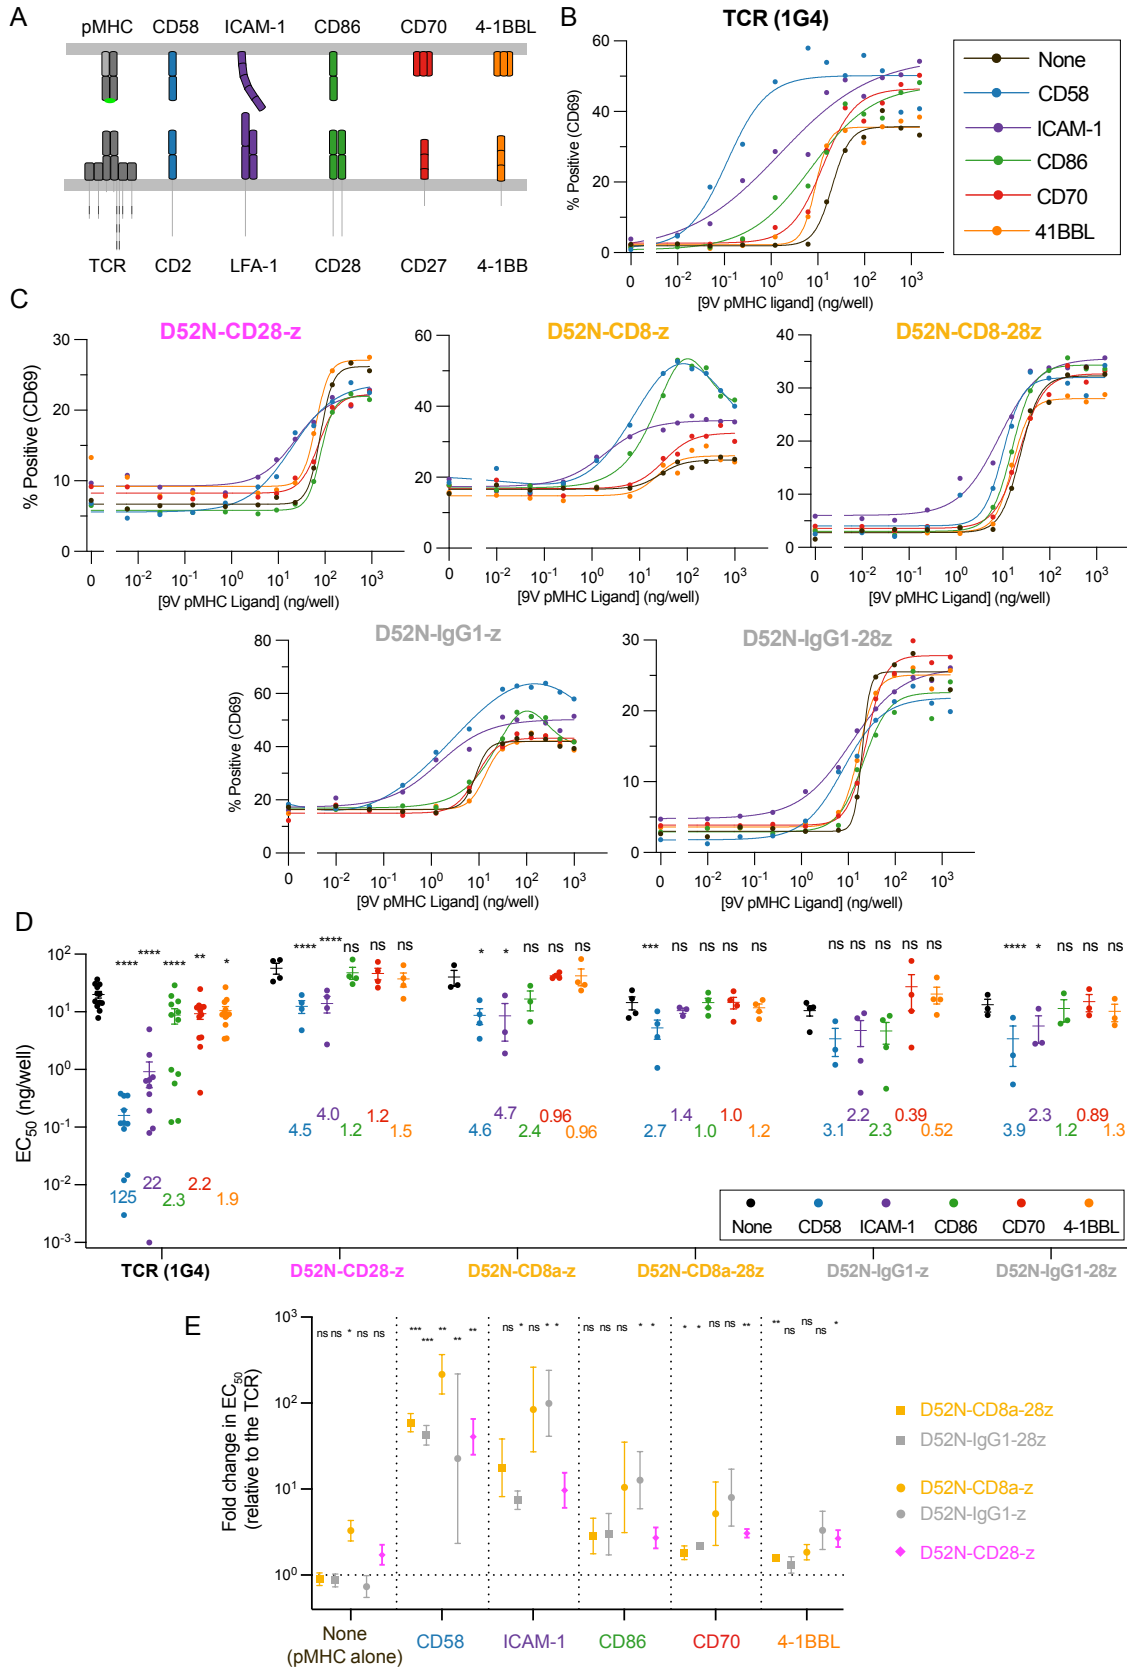

Figure 2

**Figure 2: Systematic engagement of accessory receptors identifies that CARs are inefficient at exploiting the adhesion receptors CD2 and LFA-1 relative to the TCR.** (A) Schematic of accessory receptors and their ligands. (B-C) Representative dose-response curves showing T cell activation by upregulation of surface CD69 measured by flow cytometry after 24 hours using the solid-phase stimulation assay. T cells were presented with purified pMHC alone ('None') or with a fixed concentration of 250 ng/well of the indicated accessory receptor ligand (colours) for the (B) TCR and (C) the indicated CARs. (D) The EC<sub>50</sub> values for the indicated antigen receptor and purified ligand condition were obtained by fitting a Hill function to each dose-response curve. Individual EC<sub>50</sub> values for each antigen receptor are from an independent experiment (N≥3). The numbers indicate the fold-change in EC<sub>50</sub> induced by the accessory receptor ligand relative to pMHC alone ('None') and statistical significance is determined by a paired t-test on log-transformed data. (E) The data in (D) is presented in a different format showing the fold-change in EC<sub>50</sub> between the TCR and the indicated CAR for pMHC alone or the indicated accessory receptor ligand. The fold-change is compared using a one-sample t-test to a hypothetical value of 0 on log-transformed data. Abbreviations: \* = p-value≤0.05, \*\* = p-value≤0.01, \*\*\* = p-value≤0.001, \*\*\*\* = p-value≤0.0001



122 **Abrogating the CD2 and LFA-1 interaction reduces the antigen sensitivity difference between the**  
123 **TCR and CARs**

124 Our results using an artificial system indicate that the antigen sensitivities of the TCR and CARs were  
125 similar when recognising purified antigen in isolation but exhibited large differences with the addition of  
126 purified ligands to CD2 or LFA-1 (Fig. 1-2). To investigate the role of these accessory adhesion receptor  
127 interactions in target cell recognition, we utilised the HLA-A\*02:01+ U87 glioblastoma cell line, which  
128 expresses CD58 and ICAM-1 (Fig. S7A-B). We compared the TCR to the 1st generation CD8a hinge CAR  
129 (D52N-CD8a-z) because this CAR displayed the largest increase in antigen sensitivity when adding purified  
130 CD58 and ICAM-1 (Fig. 2D). We used blocking antibodies (Fig. 3A-D) or CRISPR (Fig. S7A-B, Fig.  
131 3E-H) to abrogate CD58 and/or ICAM-1 engagement, and quantitated the effect on T cell sensitivity to  
132 pMHC antigen by measuring CD69 and 4-1BB expression. There was a profound ~100-fold difference  
133 in antigen sensitivity between TCR and CAR-transduced T cells, as shown above with T2 cell targets,  
134 which decreased to ~20-fold when abrogating both the CD2 and LFA-1 interaction (Fig. 3C-D,G-H, left  
135 panels). This decrease was mainly the result of a decrease in antigen sensitivity of the TCR (Fig. 3C-  
136 D,G-H, right panels). The fact that the antigen sensitivity of the TCR remained 20-fold higher than the  
137 CAR indicates that other mechanisms, including perhaps other ligand interactions, contribute to its higher  
138 sensitivity. In support of this, the U87 cell line expresses LFA-1 ligands other than ICAM-1 (Fig. S7C).  
139 In summary, our experiments with antigen presented on artificial surfaces or cells suggest that TCRs have  
140 higher antigen sensitivities than CARs because they exploit the accessory receptors such as CD2 and LFA-1  
141 more efficiently.

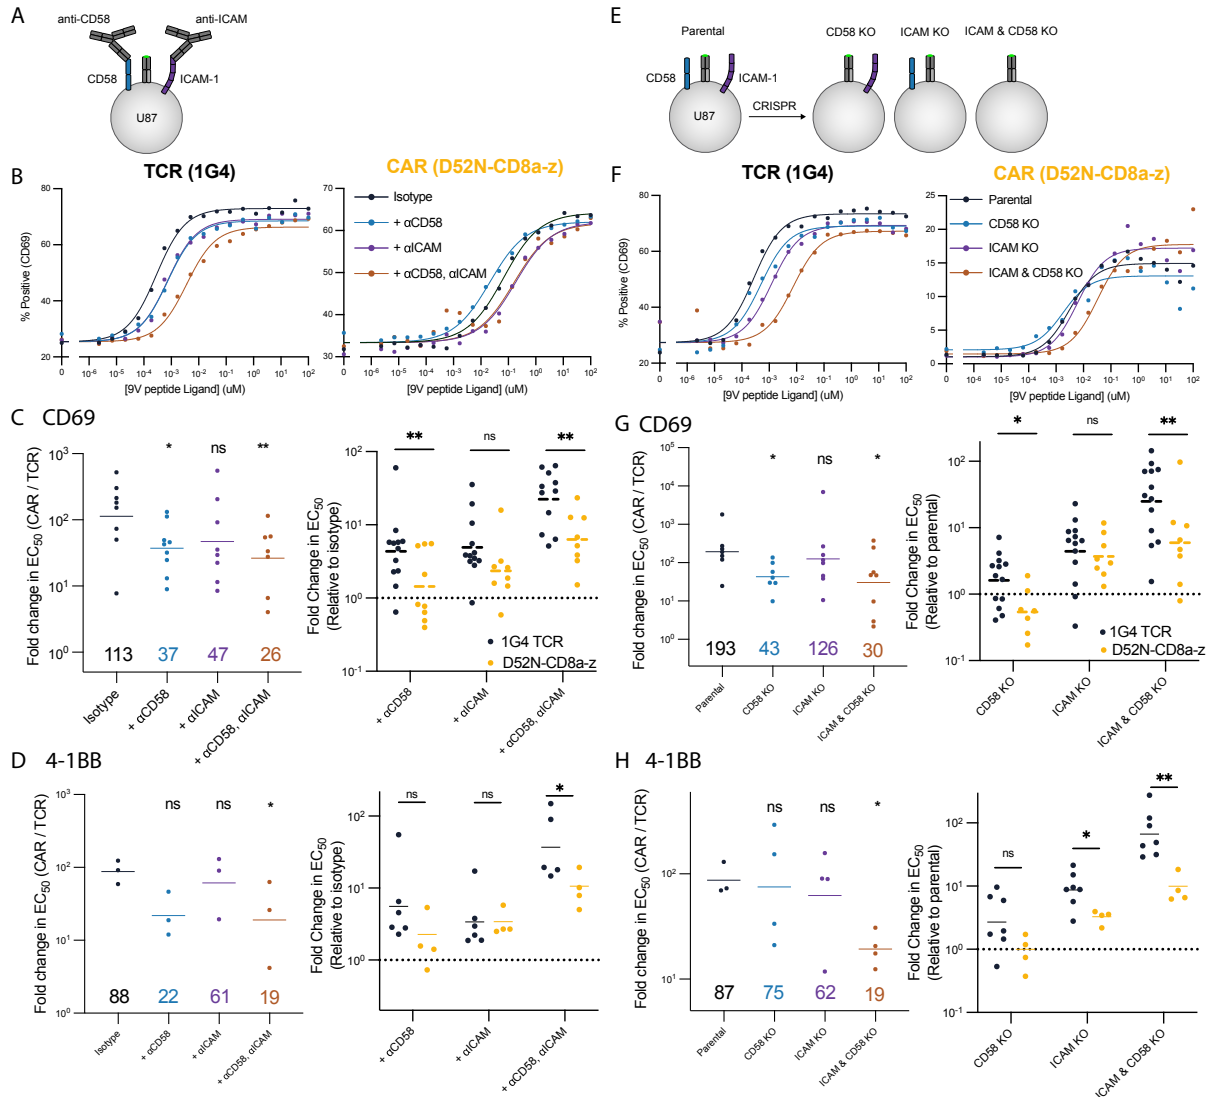

**Figure 3: Abrogating the CD2 and LFA-1 adhesion interaction disproportionately impact the antigen sensitivity of the TCR compared to the CAR.** (A) Schematic of CD58 and ICAM-1 blocking experiment on the HLA-A2+ glioblastoma U87 target cell line. (B) Representative dose-response curves for the indicated blocking conditions for the TCR (left) and CAR (right). (C-D) Fold-change in EC<sub>50</sub> between the CAR and TCR (left) or relative to the isotype (right) for (C) CD69 and (D) 4-1BB upregulation. (E) Schematic of CD58 and ICAM-1 knockout experiments. (F) Representative dose-response curves for the indicated target cell lines for the TCR (left) and CAR (right). (G-H) Fold-change in EC<sub>50</sub> between the CAR and TCR (left) or relative to the isotype (right) for (G) CD69 and (H) 4-1BB. Individual EC<sub>50</sub> values for CD69 or 4-1BB are determined by a fit to the dose-response curve from at least 3 independent experiments (each data point in C,D,G,H is from an independent experiment). The fold-change between the TCR and CAR is compared using a two-sample t-test to the isotype or parental line condition (left panel in C, D, G, H) or directly between the TCR and CAR (right panels in C, D, G, H) on log-transformed values. Abbreviations: \* = p-value ≤ 0.05, \*\* = p-value ≤ 0.01, \*\*\* = p-value ≤ 0.001, \*\*\*\* = p-value ≤ 0.0001.

142 **STARs display TCR-like antigen sensitivity outperforming TRuCs and CARs by efficiently**  
143 **exploiting adhesion receptors**

144 The ability of the TCR to exploit adhesion interactions has been shown to depend on both TCR signalling  
145 (50) and structural features of the TCR/pMHC interaction (23). The fact that conventional CARs lack  
146 signalling motifs present in the native TCR/CD3 complex has motivated the construction of new chimeric  
147 receptors. These include CARs containing cytoplasmic signalling chain of CD3 $\epsilon$  (17, 18); TruCs, in which  
148 the scFv is fused to the extracellular domain of CD3 $\epsilon$  and assembled into a complete TCR complex (19); and  
149 STARs, in which the TCR  $\alpha$  and  $\beta$  chain variable domains are replaced with the antibody variable domains  
150 (20). These new chimeric receptors increasingly resemble the native TCR complex in terms of signalling  
151 components and structure (Fig. 4A).

152 To directly compare the antigen sensitivities of these receptors using our system we generated versions  
153 containing the D52N variable domains (Fig. 4A). The CAR and eTruC incorporated the D52N scFv, which  
154 contains a linker between the variable domains, and bind its pMHC ligand (Fig. S5). The STAR incorporates  
155 the D52N variable domains into separate chains (Fig. S1). Because this lacks the linker present in the scFv  
156 we generated purified STAR and confirmed that it bound the pMHC, albeit with a 10-fold lower affinity than  
157 scFv (Fig. S8). When transduced into T cells the surface expression of these new chimeric receptors was  
158 indistinguishable from the 1G4 TCR (Fig. S2D, last three columns).

159 We next measured the sensitivity of these chimeric receptors to antigen presented on cells (APC stim-  
160 ulation) using target cell killing and CD69 upregulation as readouts (Fig. 4B-E). We found that the STAR  
161 performed identically to the TCR, while the eTruC was intermediate between them and the standard  $\zeta$ -chain  
162 CAR. The  $\epsilon$ -chain CAR was less sensitive than the  $\zeta$ -chain CAR. To determine if adhesion interactions  
163 can account for these differences, we examined the impact of CD2 engagement on sensitivity to antigen  
164 presented on plates (solid-phase stimulation), using CD69 upregulation and cytokine production as read-  
165 outs (Fig. 4F-I). As before, we found nearly identical antigen sensitivities for all antigen receptors when  
166 presented with purified antigen alone. Addition of the CD2 ligand CD58 increased antigen sensitivity by  
167 different amounts, mirroring the antigen hierarchy observed with APC stimulation. Indeed, the efficiency  
168 with which an antigen receptor was able to exploit CD2 engagement directly predicted its antigen sensitiv-  
169 ity measured using cells (Fig. 4J). We repeated the solid-phase stimulation assay using the LFA-1 ligand  
170 ICAM-1 and found a similar conclusion, albeit with lower fold-changes (Fig. S9). Taken together, these  
171 results suggest that the antigen sensitivity of these TCR-like chimeric antigen receptors depends on their  
172 ability to exploit the CD2/CD58 and LFA-1/ICAM-1 adhesion interactions.

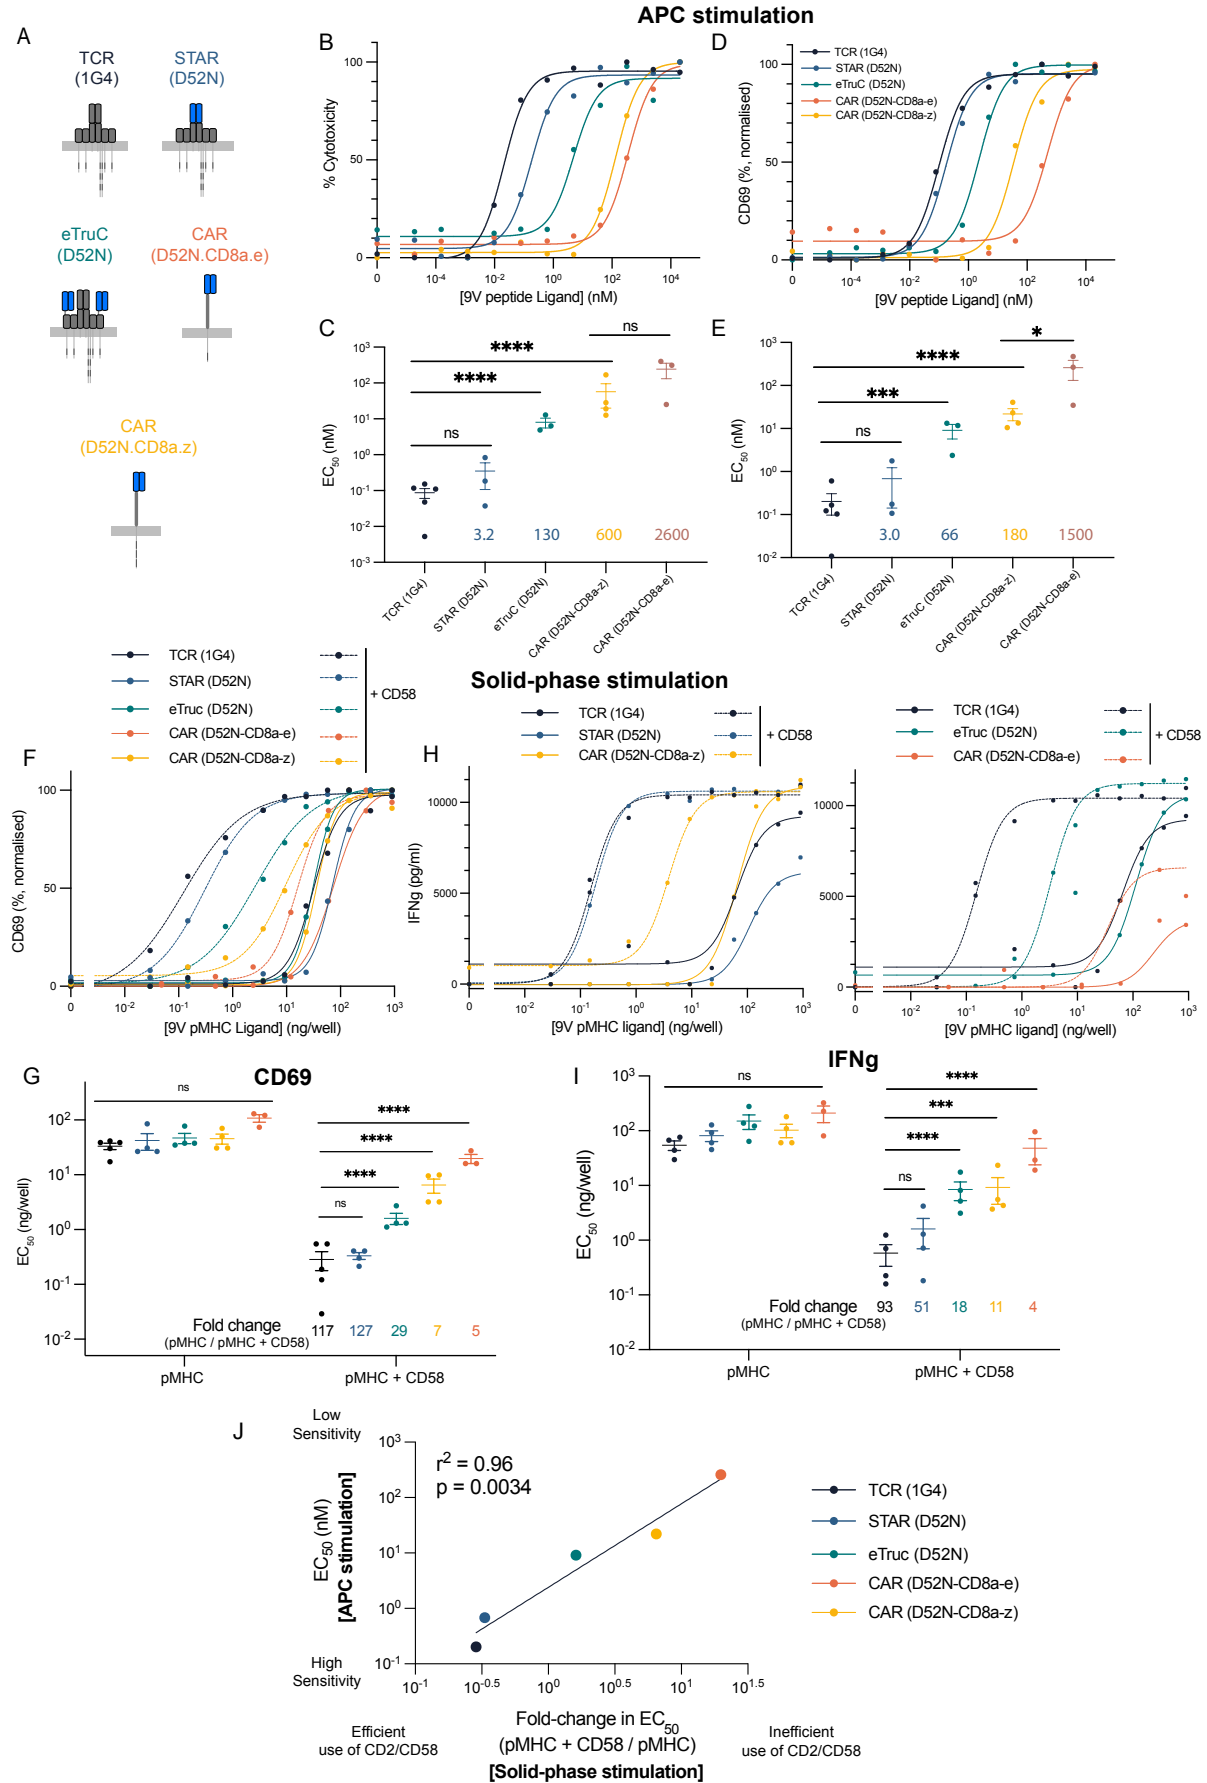

Figure 4

Figure 4: **The ability of TCR-like chimeric antigen receptors to recapitulate the sensitivity of the TCR depends on the efficiency with which they are able to exploit the CD2 adhesion interaction.** (A) Schematic of ‘TCR-like’ engineered antigen receptors. (B-E) T cells expressing the indicated antigen receptor were co-cultured with T2 target cells pulsed with different peptide antigen concentrations for 8 hours. Representative dose-response (top) and fitted EC<sub>50</sub> values from at least 3 independent experiments (bottom) are shown for (B,C) cytotoxicity (measured by LDH release) and (D,E) CD69 upregulation. (F-I) T cells expressing the indicated antigen receptor were stimulated by a titration of purified pMHC alone (solid lines) or in combination with a fixed concentration of purified CD58 (dashed lines). Representative (F,H) dose-response curves and (G,I) fitted EC<sub>50</sub> values from at least 3 independent experiments for (F,G) CD69 upregulation and (H,I) IFN $\gamma$  production. (J) The averaged EC<sub>50</sub> values for CD69 upregulation from the APC stimulation assay (from panel C) are plotted over the averaged fold-change in EC<sub>50</sub> for CD69 induced by the addition of CD58 from the solid-phase stimulation assay (from panel G). The EC<sub>50</sub> values are compared using a one-way ANOVA on log-transformed values (C,E,G,I). Abbreviations: \* = p-value $\leq$ 0.05, \*\* = p-value $\leq$ 0.01, \*\*\* = p-value $\leq$ 0.001, \*\*\*\* = p-value $\leq$ 0.0001.

## 173 Discussion

174 The ability of CAR T cells to control cancer cell mutants that express low antigen levels will depend on  
175 their sensitivity to antigen (1, 2, 6). We have shown here that several CAR formats, including 1<sup>st</sup> and 2<sup>nd</sup>  
176 generation CARs have a >100-fold lower sensitivity to antigen than the TCR. We further showed that this  
177 low sensitivity is the result of a failure of these CARs to efficiently exploit the adhesion receptors CD2  
178 and, to a lesser extent, LFA-1. Finally, we show that this failure is reversed when chimeric receptors are  
179 redesigned to match more closely the native TCR structure.

180 Because it difficult to vary the CAR target antigen concentrations on cells, only a handful of studies  
181 have directly measured the antigen sensitivity of CARs. Consistent with our work, these studies reported  
182 a ~100-1000-fold defect in CAR antigen sensitivity compared to the TCR. Using a CAR containing the  
183 variable domains of a TCR, Harris et al (9) showed that both 1<sup>st</sup> and 2<sup>nd</sup> generation CARs exhibited a ~100-  
184 fold lower antigen sensitivity than the native TCR. Wang et al (51) found similar defects when using primary  
185 T cells and, consistent with our findings, observed only modest impacts of CD28 engagement on the antigen  
186 sensitivity of TCR and CARs (Fig. 2). Gudipati et al (10) report similar findings using antigens presented on  
187 planar bilayers, which contained ICAM-1, consistent with our result in our solid-phase stimulation system  
188 when ICAM-1 is included (Fig. 2E). When comparing the antigen sensitivities of different CARs, Majzner  
189 et al (16) found that CARs with the CD28 hinge produced the highest sensitivity. This was achieved with  
190 a 1st generation CAR and thus did not require signalling by CD28 or 4-1BB. We also found that the CD28  
191 hinge CAR produced the highest antigen sensitivity among the CARs we tested (Fig. 1) and that CD28 or  
192 4-1BB ligands produced only modest enhancements in antigen sensitivity (Fig. 2). Lastly, Salter et al (11)  
193 showed that incorporation of a proline rich region or the GRB2 SH2 domain into a 2nd generation CAR with  
194 4-1BB signalling domain can enhance antigen sensitivity but these CARs continued to display lower antigen  
195 sensitivity than the 2nd generation CARs with CD28 signalling domains. We note that, while co-stimulation  
196 signals have a modest impact on antigen sensitivity, they are nevertheless critical for *in vivo* tumour control,  
197 presumably because they improving CAR-T cell persistence and increase cytokine production (52). Thus,  
198 our results are consistent with the previous studies, and extend them by identifying inefficient exploitation  
199 of adhesion receptors as a cause of the reduced antigen sensitivity of CARs.

200 While studies in mice suggested a modest role for CD2 (29, 53), it is clearly important in human T cells  
201 function (32, 54), including elimination of cancerous (55) and virus-infected (56) cells. Defects in CD58  
202 (either loss of expression or mutations) have been reported in B cell and T cell lymphomas (57–59) and CD2  
203 expression on tumour infiltrating T cells has been shown to correlate with their function in several cancers  
204 (60). Patients with B cell lymphomas with CD58 defects showed reduced progression-free survival when  
205 treated with axicabtagene ciloleucel CAR-T cell therapy (61). This implies that even the reduced ability of  
206 CARs to exploit CD2 can impact *in vivo* efficacy. Our finding that TruCs and STARS can more efficiently  
207 exploit CD2 to achieve higher antigen sensitivities is consistent with the finding that a STAR outperformed  
208 an eTruC, and that both outperformed CARs in an *in vivo* xenograft tumour model (20).

209 Although high antigen sensitivity is often beneficial, there are scenarios where low antigen sensitivity is  
210 desirable, such as when the target antigen is expressed at high levels on cancer cells and low levels on normal  
211 cells (62, 63). It has previously been shown that antigen sensitivity can be tuned by changing the affinity of  
212 the CAR (46, 63, 64) or by using transcriptional circuits (65). The results presented here show that antigen  
213 sensitivity can also be tuned by altering the CAR architecture. For example, the sensitivity hierarchy that  
214 we observe [STARS > TruCs > CAR (CD28 hinge) > CAR (CD8a hinge) > CAR (IgG1 hinge)] suggests  
215 that standard CARs may be preferred for targeting cancers that overexpress antigens also expressed on

216 normal cells. In contrast, STARS may be preferred in cancers with low levels of target antigen or which  
217 commonly escape by reducing expression of the antigen. Importantly, STARS would remain susceptible to  
218 immune evasion by cancer cells losing expression of CD58 and/or ICAM-1. An advantage of tuning antigen  
219 sensitivity by changing the CAR architecture is that changes to the recognition domain are not required,  
220 reducing the risk of inadvertently altering its specificity.

221 The TCR, and indeed CARs, belong to a large and diverse group of surface receptors known as im-  
222 munoreceptors or Non-catalytic Tyrosine-phosphorylated Receptors (NTRs) (66). The mechanism by which  
223 these receptors convert extracellular ligand binding into intracellular signaling, known as receptor triggering,  
224 remains debated. In the case of the TCR, allosteric conformational changes have been proposed as a trig-  
225 gering mechanism (67). While previous work has shown that grafting antibody variable domains to replace  
226 TCR variable domains produces a functional receptor (20, 68), it was unclear how this receptor compared to  
227 the native TCR. Our results here show that this chimeric receptor (STAR/HIT) is indistinguishable from the  
228 TCR in terms of antigen sensitivity. This observation is difficult to reconcile with allosteric models of TCR  
229 activation given the very limited conservation between antibody and TCR variable domains. Our results are,  
230 however, compatible with conformational changes induced by mechanical pulling forces.

231 In conclusion, we show that it is possible to engineer chimeric receptors with the same antigen sensitiv-  
232 ities as the TCR, and that this requires that they efficiently exploit the adhesion receptors CD2 and LFA-1.  
233 This suggests a simple way to tune antigen sensitivity in order to optimise the functional effect of T cells.  
234 While our results suggest a strategy to reduce immune escape, it does not eliminate it because cancers can  
235 abolish expression of the target antigen. Other strategies, including targeting multiple antigens, may be  
236 necessary to further reduce escape (69). There is increasing interest in re-directing other immune cells, such  
237 as macrophages, using chimeric antigen receptors (70, 71). Since these cell do not usually express CD2,  
238 our work suggests that introducing CD2 or another adhesion receptor may be necessary to achieve the same  
239 remarkable antigen sensitivity as the TCR.

## 240 **Acknowledgements**

241 We thank Marion H. Brown, Philipp Kruger, and John Nguyen for helpful discussion and reagents. We  
242 thank Linda Wooldridge and Christoph Renner for the DT227/8KA HLA-A2 and D52N CAR constructs,  
243 respectively.

## 244 **Funding**

245 The work was funded by a Wellcome Trust Senior Fellowship in Basic Biomedical Sciences (207537/Z/17/Z  
246 to OD), a Guy Newton Translational Grant (to OD), a Wellcome Trust PhD Studentship in Science (203737/Z/16/Z  
247 to JP), and the EPSRC & BBSRC Doctoral Training Centre in Synthetic Biology (EP/L016494/1, supported  
248 J.B. and J.A.S.-F).

## 249 **Materials & Methods**

### 250 **Peptides**

251 Peptides were synthesised at a purity of >95% (Peptide Protein Research, UK). 9V refers to a peptide  
252 derived from NY-ESO<sub>157–165</sub> (SLLMWITQV), 4A is derived from the same sequence (SLLAWITQV), and  
253 SL9 refers to a peptide from HIV p17 GAG<sub>77–85</sub> (SLYNTVATL).

### 254 **Protein production**

255 HLA-A\*02:01 heavy chain (UniProt residues 25–298) with a C-terminal BirA tag and  $\beta_2$ -microglobulin  
256 were expressed as inclusion bodies in *E.coli*, refolded *in vitro* as described in (72) together with the rel-  
257 evant peptide variants, and purified using size-exclusion chromatography on a Superdex S75 column (GE  
258 Healthcare, USA) in HBS-EP buffer (10 mM M HEPES pH 7.4, 150 mM NaCl, 3 mM EDTA, 0.005% v/v  
259 Tween-20). Purified pMHC was biotinylated using the BirA enzyme (Avidity, USA).

260 His-tagged, soluble extracellular domain (ECD) of human CD58 was produced either in Freestyle 293F  
261 suspension cells (Thermo Fisher) or adherent HEK 293T cells. His-tagged, soluble versions of the ECD  
262 of human ICAM1, 41BBL, CD70 and CD86 were produced using adherent HEK 293T cells. Freestyle  
263 293F suspension cells were transfected using Freestyle MAX reagent, as previously reported (32). Adher-  
264 ent HEK 293T cells were transfected using Roche X-tremeGENE HP transfection reagent following the  
265 manufacturer's protocol. In both cases the resulting supernatant was filtered with a 0.45  $\mu$ m filter and pro-  
266 teins were then purified using Ni-NTA agarose columns. Biotinylation was either performed *in vitro* after  
267 purification, or *in situ* by co-transfection (final proportion 10%) of a secreted BirA and adding 100  $\mu$ M D-  
268 biotin to the growth media. Further purification and excess biotin removal was performed by size exclusion  
269 chromatography in HBS-EP.

270 D52N chains were produced as inclusion bodies in *E. coli* and refolded *in vitro* as described in (73),  
271 except that inclusion bodies were solubilised in 20 mM Tris-HCl (pH 8.0), 8 M urea, 2 mM DTT, refolding  
272 buffer contained 150 mM Tris-HCl (pH 8.0), 3 M urea, 200 mM Arg-HCl, 0.5 mM EDTA, 0.1 mM PMSF,  
273 and the refolding mixture was dialysed against 10 mM Tris-HCl (pH 8.5). The D52N dimer was purified on  
274 anion-exchange chromatography on a HiTrap Q column, followed by size-exclusion chromatography on a  
275 Superdex S200 column (both from GE Healthcare).

276 All purified proteins were aliquoted and stored at  $-80^\circ\text{C}$  until use.

### 277 **Lentiviral production**

278 HEK 293T cells were seeded in DMEM supplemented with 10% FBS and 1% penicillin/streptomycin in  
279 6-well plates to reach 60–80% confluency on the following day. Cells were transfected with 0.25  $\mu$ g pRSV-  
280 Rev (Addgene, #12253), 0.53  $\mu$ g pMDLg/pRRE (Addgene, #12251), 0.35  $\mu$ g pMD2.G (Addgene, #12259),  
281 and 0.8  $\mu$ g of transfer plasmid using 5.8  $\mu$ l X-tremeGENE HP (Roche). Media was replaced after 16 hours  
282 and supernatant harvested after a further 24 hours by filtering through a 0.45  $\mu$ m cellulose acetate filter.  
283 Supernatant from one well of a 6-well plate was used to transduce 1 million T cells.



## 284 **T cell production**

285 Human CD8+ T cells were isolated from leukocyte cones purchased from the National Health Service's  
286 (UK) Blood and Transplantation service. Isolation was performed using negative selection. Briefly, blood  
287 samples were incubated with Rosette-Sep Human CD8+ enrichment cocktail (Stemcell) at 150 µl/ml for  
288 20 minutes. This was followed by a 3.1 fold dilution with PBS before layering on Ficoll Paque Plus (GE)  
289 at a 0.8:1.0 ficoll to sample ratio. Ficoll-Sample preparation was spun at 1200 xg for 20 minutes at room  
290 temperature. Buffy coats were collected, washed and isolated cells counted. Cells were resuspended in  
291 complete RPMI (RPMI supplemented with 10% v/v FBS, 100 Units/ml penicillin, 100 µg/ml streptomycin)  
292 with 50 U/ml of IL-2 (PeproTech) and CD3/CD28 Human T-activator Dynabeads (Thermo Fisher) at a 1:1  
293 bead to cell ratio. At all times isolated human CD8+ T cells were cultured at 37 °C and 5% CO<sub>2</sub>.

294 1 million cells in 1 ml of media were subsequently transduced on the following day using lentivirus  
295 encoding for the various constructs (e.g., TCR), per the section on lentiviral transduction. On days 2 and 4  
296 post-transduction, 1 ml of media was exchanged and IL-2 was added to a final concentration of 50 U/ml.  
297 Dynabeads were magnetically removed on day 5 post-transduction. T cells were further cultured at a density  
298 of 1 million cells/ml and supplemented with 50 U/ml IL-2 every other day. T cells were used between 10  
299 and 16 days after transduction.

## 300 **APC stimulation (co-culture with T2 cells)**

301 T2 cells were stained with 5 µM Tag-It Violet (BioLegend) following the manufacturer's protocol and then  
302 60000 cells were seeded in a volume of 100 µL per well in a V-bottom 96 well tissue culture plate. T2 cells  
303 were then incubated with 100 µL of peptide dilution prepared to the desired concentration in complete RPMI  
304 for 1 hour at 37 °C. T2 cells were then washed, resuspended in 100 µl of complete RPMI and transferred to  
305 a flat-bottom 96 well tissue culture plate.

306 Primary T cells were counted and re-suspended in fresh media such that there were 30000 receptor  
307 positive cells per 100 µl. This volume was then added to the T2 cells transferred previously.

308 As controls for the LDH assay additional wells were prepared in triplicate containing only 30000 T cells  
309 for each construct, or only 60000 T2 cells. Both with media to the same final volume as the co-cultured  
310 cells. Triplicate wells serving as volume correction and media controls were also prepared.

311 Plates were then spun at 50 xg for 2 minutes and incubated for 8 hours at 37 °C. After this period plates  
312 were spun again at 50 xg for 2 minutes and a fraction of supernatant was removed for assessing LDH release.  
313 LDH release was assessed using CyQUANT LDH Cytotoxicity Assay Kits (Thermo Fisher) following the  
314 manufacturers protocol. EDTA was added to the remaining supernatant (final concentration 2.5 µM) and  
315 cells were detached by pipetting.

316 Cells were stained for CD69 (Clone FN50, dilution 1:200) as well as with pMHC tetramers (dilution  
317 1:500). Stained cells were either analysed immediately or fixed with 1% formaldehyde in PBS and analysed  
318 on the following day.

319 T cells were discriminated from T2 cells by the absence of Tag-It Violet stain. Single T cells were  
320 identified on the basis of size and subsequent analysis performed on this population.

### 321 **Solid-phase plate stimulation**

322 Pierce Streptavidin Coated High Capacity 96 well plates (Thermo Fisher) were washed with PBS and di-  
323 lutions of biotinylated pMHC in PBS were added to each well in a 50 µl volume and incubated for 90  
324 minutes at room temperature. Subsequently, plates were washed again with PBS and biotinylated accessory  
325 molecules (CD58, ICAM-1, CD86, CD70, 41BBL) were added at a fixed dose of 250 ng/well in 50 µl.  
326 Plates were again incubated for 90 minutes and then washed with PBS.

327 T cells were counted, washed in media and 75000 cells in 200 µl were dispensed per well, Plates were  
328 spun for 2 minutes at 50 xg and then incubated for 24 hours at 37 °C. Following this incubation a portion of  
329 supernatant was removed and stored for performing ELISAs. EDTA was added to the remaining supernatant  
330 (final concentration 2.5 mM) and cells were detached by pipetting. Collected cells were stained for CD45  
331 (Clone HI30, dilution 1:200), CD69 (Clone FN50, dilution 1:200), 4-1BB (Clone 4B4-1, dilution 1:200)  
332 and with tetrameric PE-conjugated pMHC. Cells were analysed either immediately or 1 day later, following  
333 fixation with 1% formaldehyde in PBS.

### 334 **Generating U87 knockout cell lines**

335 U87 cells (a kind gift of Vincenzo Cerundolo) were used to generate genetic knockouts for CD58, ICAM1,  
336 or both using CRISPR Cas9 RNP transfection. To generate CD58 KO cells, 50,000 U87 cells were seeded  
337 in a 24-well plate and transfected the next day using Lipofectamine CRISPRMAX Cas9 Transfection  
338 agent (Thermo Fisher), annealed crRNA:tracrRNA (TrueGuide CRISPR758411\_CR, GTC AATGCACAAGT-  
339 TAGTGT, Thermo Fisher; A35506 for tracrRNA, Thermo Fisher), and TrueCut Cas9 Protein v2 (Thermo  
340 Fisher, A36496) according to manufacturer's instructions. Cells were FAC sorted and this mixed population  
341 was used for all experiments. Sorted CD58 KO cells or WT U87 cells were used to generate CD58/ICAM1  
342 double KO cells or ICAM1 KO cells, respectively using the same protocol as above. Specifically, cells were  
343 transfected with crRNA:tracrRNA (TrueGuide CRISPR845351\_CR, GCTATTCAAAC TGCCCTGAT, Thermo  
344 Fisher) and subsequently FAC sorted. Accutase (Biolegend 423201) was used to dissociate cells before  
345 screening or sorting with anti-CD58 (TS2/9, Invitrogen 12-0578-42) or anti-ICAM1 (HA58, Biolegend  
346 353114) to prevent potential digestion of CD58 or ICAM1 by trypsin. All cell lines showed similar expres-  
347 sion of HLA-A2 by flow cytometry (clone BB7.2, Biolegend 343306).

### 348 **APC stimulation (co-culture with U87 cells)**

349 25000 U87 cells were seeded in a tissue culture treated flat-bottom 96 well plate and grown overnight. On  
350 the following day the media was removed from these cells and they were incubated with peptides prepared to  
351 the appropriate concentration in complete DMEM (DMEM supplemented with 10% v/v FBS, 100 Units/ml  
352 penicillin, 100 µg/ml streptomycin) for 1 hour at 37 °C.

353 If blocking antibodies were used then the appropriate amount of T cells were incubated for 30 minutes  
354 prior to addition to the U87 cells with either anti-IgG1 x Isotype control (BioLegend, Clone MOPC-21),  
355 anti-CD58 (BioLegend, Clone TS2/9) or anti-ICAM1 (eBioscience, Clone HA58) at a concentration of  
356 10 µg/ml. Alternatively, both anti-CD58 and anti-ICAM1 together at a concentration of 5 µg/ml each (total  
357 antibody concentration 10 µg/ml).

358 Peptide containing media was then removed and 50,000 T cells per well were added. The co-culture  
359 was then spun for 2 minutes at 50  $\times g$ , and incubated for 4 hours at 37 °C. After this period a fraction of  
360 supernatant was removed for cytokine ELISAs and stored at -20 °C. EDTA was added to the remaining  
361 supernatant (final concentration 2.5  $\mu M$ ) and cells were detached by pipetting.

362 Cells were stained in PBS 1% BSA for CD45 (Clone HI30, dilution 1:200), CD69 (Clone FN50, dilution  
363 1:200) and 4-1BB (Clone 4B4-1, dilution 1:200) as well as with PE-conjugated tetrameric pMHC (dilution  
364 1:500). Stained cells were either analysed immediately or fixed with 1% formaldehyde in PBS and analysed  
365 on the following day.

366 T cells were discriminated from U87 cells by CD45 staining and/or an assessment of size and complex-  
367 ity. Single T cells were identified on the basis of size and subsequent analysis performed on this population.

### 368 **Flow cytometry**

369 Tetramers were produced using refolded monomeric biotinylated pMHC and streptavidin-PE (Biolegend) at  
370 a 1:4 molar ratio. Streptavidin-PE was added in 10 steps with a 10 minute incubation at room temperature  
371 between each addition. 0.05–0.1% sodium azide was added for preservation and tetramers were kept for up  
372 to 3 months at 4 °C.

373 Samples were analysed using a BD LSR Fortessa X-20 (BD Biosciences) or CytoFLEX LX (Beckman  
374 Coulter) flow cytometer and data analysis was performed using FlowJo v10 (BD Biosciences).

### 375 **Electroporation of 868 TCR**

376 868 TCR alpha and beta chains were amplified using PCR, adding a T7 promoter at the 5' end. The resulting  
377 PCR product was 'cleaned up' using a NucleoSpin Gel and PCR clean-up kit (Macherey-Nagel). Capped  
378 and Poly(A) tailed mRNA was produced from this PCR product using a mMESSAGE mMACHINE™ T7  
379 ULTRA Transcription Kit (ThermoFisher). mRNA was collected by lithium chloride precipitation, quality  
380 checked by gel electrophoresis and stored in single use aliquots at -80 °C.

381 For electroporation, T cells are collected and washed 3x with Opti-MEM (Gibco) and resuspended at  
382 a concentration of  $25 \times 10^6$  cells/ml.  $5 \times 10^6$  cells with 2  $\mu g$  per million cells of each of the RNA for the  
383 TCR $\alpha$ ,  $\beta$  and  $\zeta$  chains. Cells were then aliquoted in 200  $\mu l$  into an electroporation cuvette (Cuvette Plus 2mm  
384 gap BTX). Electroporation is performed using an ECM 830 Square Wave electroporation system (BTX) at  
385 300 V for 2 ms. Cells are then transferred to pre-warmed complete RPMI at a density of  $1 \times 10^6$  cells/ml.  
386 Electroporated cells are used in assays 24 hours later.

### 387 **Immobilisation Assay**

388 Following a plate stimulation assay, after cells were collected, plates were washed 3 times with PBS 0.05%  
389 TWEEN 20 ('PBST') and then stained with anti-HLA-A,B,C (clone W6/32, dilution 1:1000) in PBS for 2  
390 hours at room temperature. Plates were then washed 3x with PBST and stained with secondary goat anti-  
391 mouse IgG IRDye 800CW (LI-COR) in PBS for a further 2 hours. Finally plates were washed one more

392 time with PBST and then imaged using a LICOR Odyssey Sa (LI-COR). Integrated intensity per well is  
393 reported.

## 394 ELISAs

395 Invitrogen Uncoated ELISA kits for IFN $\gamma$  (Thermo Fisher) were used following the manufacturer's protocol.  
396 Supernatants were either used immediately for ELISAs post-harvesting or stored at  $-20^{\circ}\text{C}$  for up-to 2  
397 weeks. Supernatants were diluted using an empirically determined ratio before use in an ELISA so that  
398 quantities of assessed cytokines fell within the linear range of the kits.

## 399 Surface Plasmon Resonance

400 D52N-pMHC interactions were analysed on a Biacore T200 instrument (GE Healthcare Life Sciences) at  
401  $37^{\circ}\text{C}$  and a flow rate of  $30\ \mu\text{l}/\text{min}$ . Running buffer was HBS-EP (10 mM HEPES pH 7.4, 150 mM NaCl,  
402 3 mM EDTA, 0.005% v/v Tween-20). Streptavidin was coupled to CM5 sensor chips using an amino  
403 coupling kit (GE Healthcare Life Sciences) to near saturation, typically 10,000–12,000 response units (RU).  
404 Biotinylated pMHCs (47 kDa) were injected into the experimental flow cells (FCs) for different lengths of  
405 time to produce desired immobilisation levels (300–1000 RU). FC1 and FC3 were used as reference FCs for  
406 FC2 and FC4, respectively. Biotinylated ECD of CD58 (24 kDa + 25 kDa glycosylation) was immobilised in  
407 the reference FCs at levels matching those of pMHCs. Excess streptavidin was blocked with two 40 s (D52N  
408 STAR) or 60 s (D52N scFv) injections of  $250\ \mu\text{M}$  biotin (Avidity). Before injections of purified D52N, the  
409 chip surface was conditioned with eight injections of the running buffer. Dilution series of D52N were  
410 injected simultaneously in all FCs starting from the lowest concentration, which was injected again after the  
411 highest concentration to confirm stability of pMHC on the chip surface. The duration of injections (20 or  
412 180 s) was the same for conditioning and D52N injections. After every 2 or 3 D52N injections, buffer was  
413 injected to generate data for double referencing. In addition to subtracting the signal from the reference FC  
414 (single referencing), all D52N binding data were double referenced versus the average of the closest buffer  
415 injections before and after D52N injection to correct for small differences in signal between flow cells.  
416 D52N binding versus D52N concentration was fitted with the following model:  $B = B_{max} \cdot \frac{[D52N]}{K_D + [D52N]}$ ,  
417 where  $B$  is the response (binding) and  $B_{max}$  is the maximal binding.

## 418 Sequences

419 D52N scFvs with the following sequence were produced by Absolute Antibody Ltd.

### 420 D52N scFv:

421 EVQLLESGGGLVQPGGSLRLSCAASGFTFSTYQMSWVRQAPGKGLEW  
422 VSGIVSSGGSTAYADSVKGRFTISRDNKNTLYLQMNSLRAEDTAVY  
423 YCAGELLPPYYGMDVWGQGT'TVTVSSAKTTPKLEEGEFSEARVQSELT  
424 QPRSVSGSPGQSVTISCTGTERDVGGYNYVSWYQQHPGKAPKLI IHN  
425 VIERSSGVPDRFSGSKSGNTASLTISGLQAEDEADYYCWSFAGGYV  
426 FGTGTDVTVLG

427 The D52N-IgG1 CARs contain a ‘HNG spacer sequence’ derived from the IgG1 hinge region, described in  
428 (74), and spliced with a spacer region from the CH2-CH3 regions of IgG1 as described in (75).

429 **HNG Spacer:**

430 DPAEPKSPDKTHTCPPCP

431 The 1G4 TCR  $\alpha$  and  $\beta$  chains are joined by a P2A linker peptide with an additional spacer and furin cleavage  
432 site, as described in (76). The sequence is given below.

433 **Furin-P2A:**

434 GSRAKRSGSGATNFSLLKQAGDVEENPGP

435 **Independent experiments and data analysis**

436 To produce independent measurements of  $EC_{50}$  (individual data points in figure panels) for a given antigen  
437 receptor, we produced a new batch of lentivirus which was used to transduce T cells isolated from a new  
438 leukocyte cone, which is provided by the National Health Service (NHS) in the UK and is obtained from  
439 human blood donors.

440 In each independent experiment, we included the TCR and one or more CARs to be tested and used  
441 pMHC antigen tetramers to evaluate the percent of T cells expressing each antigen receptor (Fig. S2C,  
442 transduction efficiency) and the surface level (gMFI of T cells expressing the antigen receptor) for each  
443 antigen receptor relative to the TCR (Fig. S2D). Although we observed variations in the transduction effi-  
444 ciency, the surface level of each antigen receptor was always at the same level or higher compared to the  
445 TCR.

446 As a result of differences in the transduction efficiency, we observed differences in the maximum num-  
447 ber of T cells that could upregulate CD69 or 4-1BB across independent experiments for the same antigen  
448 receptor or across different antigen receptors (see y-axis in Fig. 2B,C for example). These differences reflect  
449 the percent of T cells that express the antigen receptor and can therefore respond to the presented antigen.  
450 Importantly, our study focused on measuring antigen sensitivity ( $EC_{50}$ ), which is defined as the concentra-  
451 tion of antigen required to elicit half-maximal response. Therefore, variations in the maximum number of T  
452 cells able to respond are taken into account when measuring an  $EC_{50}$ .

453 Statistical analysis was performed using Prism (GraphPad Software) or Excel (Microsoft). Curve fitting  
454 was performed using the robust nonlinear regression function in Prism or MATLAB (MathWorks) and the  
455  $EC_{50}$  extracted from the fitted curves. Data was excluded from analysis if the computed fit was reported as  
456 ‘ambiguous’ in Prism, if the fit did not converge in 1000 iterations, or if the computed  $EC_{50}$  was outside of  
457 the tested ligand concentration.

## References

- 458 1. June CH, O'Connor RS, Kawalekar OU, Ghassemi S, Milone MC (2018) Car t cell immunotherapy for  
459 human cancer. *Science* 359:1361–1365.
- 461 2. Exley AR, McBlane J (2021) Regulating innovation in the early development of cell therapies. *Im-*  
462 *muno*therapy Advances 1:1–18.
- 463 3. Fry TJ, et al. (2018) Cd22-targeted car t cells induce remission in b-all that is naive or resistant to  
464 cd19-targeted car immunotherapy. *Nature Medicine* 24:20–28.
- 465 4. Park JH, et al. (2018) Long-term follow-up of cd19 car therapy in acute lymphoblastic leukemia. *New*  
466 *England Journal of Medicine* 378:449–459.
- 467 5. Shah NN, Fry TJ (2019) Mechanisms of resistance to car t cell therapy. *Nature Reviews Clinical*  
468 *Oncology* 16:372–385.
- 469 6. Majzner RG, Mackall CL (2018) Tumor antigen escape from car t-cell therapy. *Cancer Discovery*  
470 8:1219–26.
- 471 7. Brudno JN, et al. (2018) T cells genetically modified to express an anti-b-cell maturation antigen  
472 chimeric antigen receptor cause remissions of poor-prognosis relapsed multiple myeloma. *Journal of*  
473 *Clinical Oncology* 36:2267–2280.
- 474 8. Cohen A, et al. (2019) B cell maturation antigen – specific car t cells are clinically active in multiple  
475 myeloma the journal of clinical investigation b cell maturation antigen – specific car t cells are clinically  
476 active in multiple myeloma. *The Journal of Clinical Investigation* 129:2210–2221.
- 477 9. Harris DT, et al. (2018) Comparison of t cell activities mediated by human tcrs and cars that use the  
478 same recognition domains. *The Journal of Immunology* 200:1088–1100.
- 479 10. Gudipati V, et al. (2020) Inefficient car-proximal signaling blunts antigen sensitivity. *Nature Immunol-*  
480 *ogy* 21:848–856.
- 481 11. Salter AI, et al. (2021) Comparative analysis of tcr and car signaling informs car designs with superior  
482 antigen sensitivity and in vivo function. *Science Signaling* 14.
- 483 12. Eshhar Z, Waks T, Gross G, Schindler DG (1993) Specific activation and targeting of cytotoxic lym-  
484 phocytes through chimeric single chains consisting of antibody-binding domains and the  $\gamma$  or  $\zeta$  subunits  
485 of the immunoglobulin and t-cell receptors. *Proceedings of the National Academy of Sciences of the*  
486 *United States of America* 90:720–724.
- 487 13. Maher J, Brentjens RJ, Gunset G, Rivière I, Sadelain M (2002) Human t-lymphocyte cytotoxicity and  
488 proliferation directed by a single chimeric tcr $\zeta$ /cd28 receptor. *Nature Biotechnology* 20:70–75.
- 489 14. Imai C, et al. (2004) Chimeric receptors with 4-1bb signaling capacity provoke potent cytotoxicity  
490 against acute lymphoblastic leukemia. *Leukemia* 18:676–684.
- 491 15. Khalil DN, Smith EL, Brentjens RJ, Wolchok JD (2016) The future of cancer treatment: immunomod-  
492 ulation, cars and combination immunotherapy. *Nature Reviews Clinical Oncology*.
- 493 16. Majzner RG, et al. (2020) Tuning the antigen density requirement for car t-cell activity. *Cancer Dis-*  
494 *covery* 10.

- 495 17. Hartl FA, et al. (2020) Noncanonical binding of lck to cd3 $\epsilon$  promotes tcr signaling and car function.  
496 *Nature Immunology* 21:902–913.
- 497 18. Wu W, et al. (2020) Multiple signaling roles of cd3 $\epsilon$  and its application in car-t cell therapy. *Cell*  
498 182:855–871.
- 499 19. Baeuerle PA, et al. (2019) Synthetic truc receptors engaging the complete t cell receptor for potent  
500 anti-tumor response. *Nature communications* 10:1–12.
- 501 20. Liu Y, et al. (2021) Chimeric star receptors using tcr machinery mediate robust responses against solid  
502 tumors. *Science Translational Medicine* 13.
- 503 21. Mansilla-Soto J, et al. (2022) Hla-independent t cell receptors for targeting tumors with low antigen  
504 density. *Nature Medicine*.
- 505 22. Huang J, et al. (2013) A single peptide-major histocompatibility complex ligand triggers digital cytokine  
506 secretion in cd4+ t cells. *Immunity* pp 1–12.
- 507 23. Siller-Farfán JA, Dushek O (2018) Molecular mechanisms of t cell sensitivity to antigen. *Immunological*  
508 *Reviews* 285:194–205.
- 509 24. Holst J, et al. (2008) Scalable signaling mediated by t cell antigen receptor-cd3 itams ensures effective  
510 negative selection and prevents autoimmunity. *Nature immunology* 9:658–66.
- 511 25. James JR (2018) Tuning itam multiplicity on t cell receptors can control potency and selectivity to  
512 ligand density. *Science Signaling* 11.
- 513 26. Purbhoo MA, et al. (2001) The human cd8 coreceptor effects cytotoxic t cell activation and antigen  
514 sensitivity primarily by mediating complete phosphorylation of the t cell receptor chain. *Journal of*  
515 *Biological Chemistry* 276:32786–32792.
- 516 27. Irvine DJ, Purbhoo MA, Krogsgaard M, Davis MM (2002) Direct observation of ligand recognition by  
517 t cells. *Nature* 419:845–849.
- 518 28. Bachmann MF, et al. (1997) Distinct roles for lfa-1 and cd28 during activation of naive t cells : Adhesion  
519 versus costimulation. *Immunity* 7:549–557.
- 520 29. Bachmann MF, Barner M, Kopf M (1999) Cd2 sets quantitative thresholds in t cell activation. *Journal*  
521 *of Experimental Medicine* 190:1383–1392.
- 522 30. Cheadle EJ, et al. (2012) Ligation of the cd2 co-stimulatory receptor enhances il-2 production from  
523 first-generation chimeric antigen receptor t cells. *Gene Therapy* 19:1114–1120.
- 524 31. Aleksic M, et al. (2010) Dependence of t cell antigen recognition on t cell receptor-peptide mhc con-  
525 finement time. *Immunity* 32:163–74.
- 526 32. Pettmann J, et al. (2021) The discriminatory power of the t cell receptor. *eLife* 10:1–42.
- 527 33. Maus MV, et al. (2016) An mhc-restricted antibody-based chimeric antigen receptor requires tcr-like  
528 affinity to maintain antigen specificity. *Molecular Therapy — Oncolytics* 3:16023.
- 529 34. Stewart-jones G, et al. (2009) Rational development of high-affinity t-cell receptor-like antibodies.  
530 *Proceedings of the National Academy of Sciences* 106:10872–10872.

- 531 35. Rapoport AP, et al. (2015) Ny-eso-1–specific tcr–engineered t cells mediate sustained antigen-specific  
532 antitumor effects in myeloma. *Nature medicine* 21:914–921.
- 533 36. Dushek O, et al. (2011) Antigen potency and maximal efficacy reveal a mechanism of efficient t cell  
534 activation. *Science Signaling* 4:ra39.
- 535 37. Lever M, et al. (2016) A minimal signalling architecture explains the t cell response to a 1,000,000-fold  
536 variation in antigen affinity and dose. *Proc Natl Acad Sci USA* pp E6630–E6638.
- 537 38. Abu-Shah E, et al. (2020) Human cd8 + t cells exhibit a shared antigen threshold for different effector  
538 responses. *The Journal of Immunology* 205:1503–1512.
- 539 39. Trendel N, et al. (2021) Perfect adaptation of cd8+ t cell responses to constant antigen input over a wide  
540 range of affinity is overcome by costimulation.
- 541 40. Nguyen J, Pettmann J, Kruger P, Dushek O (2021) Quantitative contributions of tnf receptor superfamily  
542 members to cd8 + t-cell responses. *Molecular Systems Biology* 17:1–15.
- 543 41. Long AH, et al. (2015) 4-1bb costimulation ameliorates t cell exhaustion induced by tonic signaling of  
544 chimeric antigen receptors. *Nature Medicine* 21:581–90.
- 545 42. Oh J, et al. (2019) Single variable domains from the t cell receptor  $\beta$  chain function as mono- and  
546 bifunctional cars and tcers. *Scientific Reports* 9:1–12.
- 547 43. Lynn RC, et al. (2019) c-jun overexpression in car t cells induces exhaustion resistance. *Nature*  
548 576:293–300.
- 549 44. Thomas S, et al. (2011) Human t cells expressing affinity-matured tcr display accelerated responses but  
550 fail to recognize low density of mhc-peptide antigen. *Blood* 118:319–29.
- 551 45. Irving M, et al. (2012) Interplay between t cell receptor binding kinetics and the level of cognate peptide  
552 presented by major histocompatibility complexes governs cd8+ t cell responsiveness. *The Journal of*  
553 *biological chemistry* 287:23068–78.
- 554 46. Drent E, et al. (2017) A rational strategy for reducing on-target off-tumor effects of cd38-chimeric  
555 antigen receptors by affinity optimization. *Molecular Therapy* 25:1946–1958.
- 556 47. Dockree T, et al. (2017) Cd8+ t-cell specificity is compromised at a defined mhci/cd8 affinity threshold.  
557 *Immunology and Cell Biology* 95:68–76.
- 558 48. Hutchinson SL, et al. (2003) The cd8 t cell coreceptor exhibits disproportionate biological activity at  
559 extremely low binding affinities. *The Journal of biological chemistry* 278:24285–93.
- 560 49. Holler PD, Kranz DM (2003) Quantitative analysis of the contribution of tcr/pepmhc affinity and cd8  
561 to t cell activation. *Immunity* 18:255–64.
- 562 50. Brownlie RJ, Zamoyska R (2013) T cell receptor signalling networks: branched, diversified and  
563 bounded. *Nature Reviews Immunology* 13:257–269.
- 564 51. Wang X, et al. (2021) Extensive functional comparisons between chimeric antigen receptors and t cell  
565 receptors highlight fundamental similarities. *Molecular Immunology* 138:137–149.
- 566 52. Zhao Z, et al. (2015) Structural design of engineered costimulation determines tumor rejection kinetics  
567 and persistence of car t cells. *Cancer Cell* 28:415–428.



- 568 53. a van der Merwe P (1999) A subtle role for cd2 in t cell antigen recognition. *The Journal of Experimental Medicine* 190:1371–1374.  
569
- 570 54. Leitner J, Herndler-Brandstetter D, Zlabinger GJ, Grubeck-Loebenstern B, Steinberger P (2015)  
571 Cd58/cd2 is the primary costimulatory pathway in human cd28 cd8 + t cells. *The Journal of Immunology* 195:477–487.  
572
- 573 55. Patel SJ, et al. (2017) Identification of essential genes for cancer immunotherapy. *Nature* 548:537–542.
- 574 56. Wang ECY, et al. (2018) Suppression of costimulation by human cytomegalovirus promotes evasion of  
575 cellular immune defenses. *Proceedings of the National Academy of Sciences* 115:4998–5003.
- 576 57. Challa-Malladi M, et al. (2011) Combined genetic inactivation of  $\beta$ 2-microglobulin and cd58 reveals  
577 frequent escape from immune recognition in diffuse large b cell lymphoma. *Cancer Cell* 20:728–740.
- 578 58. Palomero T, et al. (2014) Recurrent mutations in epigenetic regulators, rhoa and fyn kinase in peripheral  
579 t cell lymphomas. *Nature Publishing Group*.
- 580 59. Razak FA, Diepstra A, Visser L, van den Berg A (2016) Cd58 mutations are common in hodgkin  
581 lymphoma cell lines and loss of cd58 expression in tumor cells occurs in hodgkin lymphoma patients  
582 who relapse. *Genes and Immunity* 17:363–366.
- 583 60. Demetriou P, et al. (2020) A dynamic cd2-rich compartment at the outer edge of the immunological  
584 synapse boosts and integrates signals. *Nature Immunology* 21:1232–1243.
- 585 61. Majzner RG, et al. (2020) *CD58 Aberrations Limit Durable Responses to CD19 CAR in Large B Cell*  
586 *Lymphoma Patients Treated with Axicabtagene Ciloleucel but Can be Overcome through Novel CAR*  
587 *Engineering* (ASH).
- 588 62. a Morgan R, et al. (2010) Case report of a serious adverse event following the administration of t cells  
589 transduced with a chimeric antigen receptor recognizing erbb2. *Molecular therapy* 18:843–851.
- 590 63. Liu X, et al. (2015) Affinity-tuned erbb2 or egfr chimeric antigen receptor t cells exhibit an increased  
591 therapeutic index against tumors in mice. *Cancer Research* 75:3596–3607.
- 592 64. Caruso HG, et al. (2015) Tuning sensitivity of car to egfr density limits recognition of normal tissue  
593 while maintaining potent antitumor activity. *Cancer Research* 75:3505–3518.
- 594 65. Hernandez-Lopez RA, et al. (2021) T cell circuits that sense antigen density with an ultrasensitive  
595 threshold. *Science* 371:1166–1171.
- 596 66. Dushek O, Goyette J, van der Merwe PA (2012) Non-catalytic tyrosine-phosphorylated receptors. *Im-*  
597 *munological Reviews* 250:258–276.
- 598 67. van der Merwe PA, Dushek O (2011) Mechanisms for t cell receptor triggering. *Nature Reviews*  
599 *Immunology* 11:47–55.
- 600 68. Kuwana Y, et al. (1987) Expression of chimeric receptor composed of immunoglobulin-derived v re-  
601 gions and t-cell receptor-derived c regions. *Biochemical and Biophysical Research Communications*  
602 149:960–968.
- 603 69. Rafiq S, Hackett CS, Brentjens RJ (2020) Engineering strategies to overcome the current roadblocks in  
604 car t cell therapy. *Nature Reviews Clinical Oncology* 17:147–167.

- 605 70. Morrissey MA, et al. (2018) Chimeric antigen receptors that trigger phagocytosis. *eLife* 7:1–21.
- 606 71. Klichinsky M, et al. (2020) Human chimeric antigen receptor macrophages for cancer immunotherapy.  
607 *Nature Biotechnology* 38:947–953.
- 608 72. Achour A, et al. (1999) Murine class i major histocompatibility complex h-2dd: expression, refolding  
609 and crystallization. *Acta Crystallographica Section D: Biological Crystallography* 55:260–262.
- 610 73. Boulter JM, et al. (2003) Stable, soluble t-cell receptor molecules for crystallization and therapeutics.  
611 *Protein engineering* 16:707–711.
- 612 74. Patel A (2017) Ph.D. thesis (UCL (University College London)).
- 613 75. Watanabe N, et al. (2016) Fine-tuning the car spacer improves t-cell potency. *Oncoimmunology*  
614 5:e1253656.
- 615 76. Yang S, et al. (2008) Development of optimal bicistronic lentiviral vectors facilitates high-level tcr gene  
616 expression and robust tumor cell recognition. *Gene therapy* 15:1411–1423.
- 617 77. Uhlén M, et al. (2015) Tissue-based map of the human proteome. *Science* 347.

618

## Supplementary Information:

619

# Inefficient exploitation of accessory receptors reduces the sensitivity of chimeric antigen receptors

620

621

622

Jake Burton<sup>1</sup>, Jesús A. Siller-Farfán<sup>1¶</sup>, Johannes Pettmann<sup>1</sup>, Benjamin Salzer<sup>1†</sup>,  
Mikhail Kutuzov<sup>1</sup>, P. Anton van der Merwe<sup>1</sup>, Omer Dushek<sup>1¶</sup>

<sup>1</sup>Sir William Dunn School of Pathology, University of Oxford, OX1 3RE, Oxford, UK

<sup>†</sup>Present address: St. Anna Children's Cancer Research Institute (CCRI), 1090, Vienna, Austria

<sup>¶</sup>Corresponding authors

623

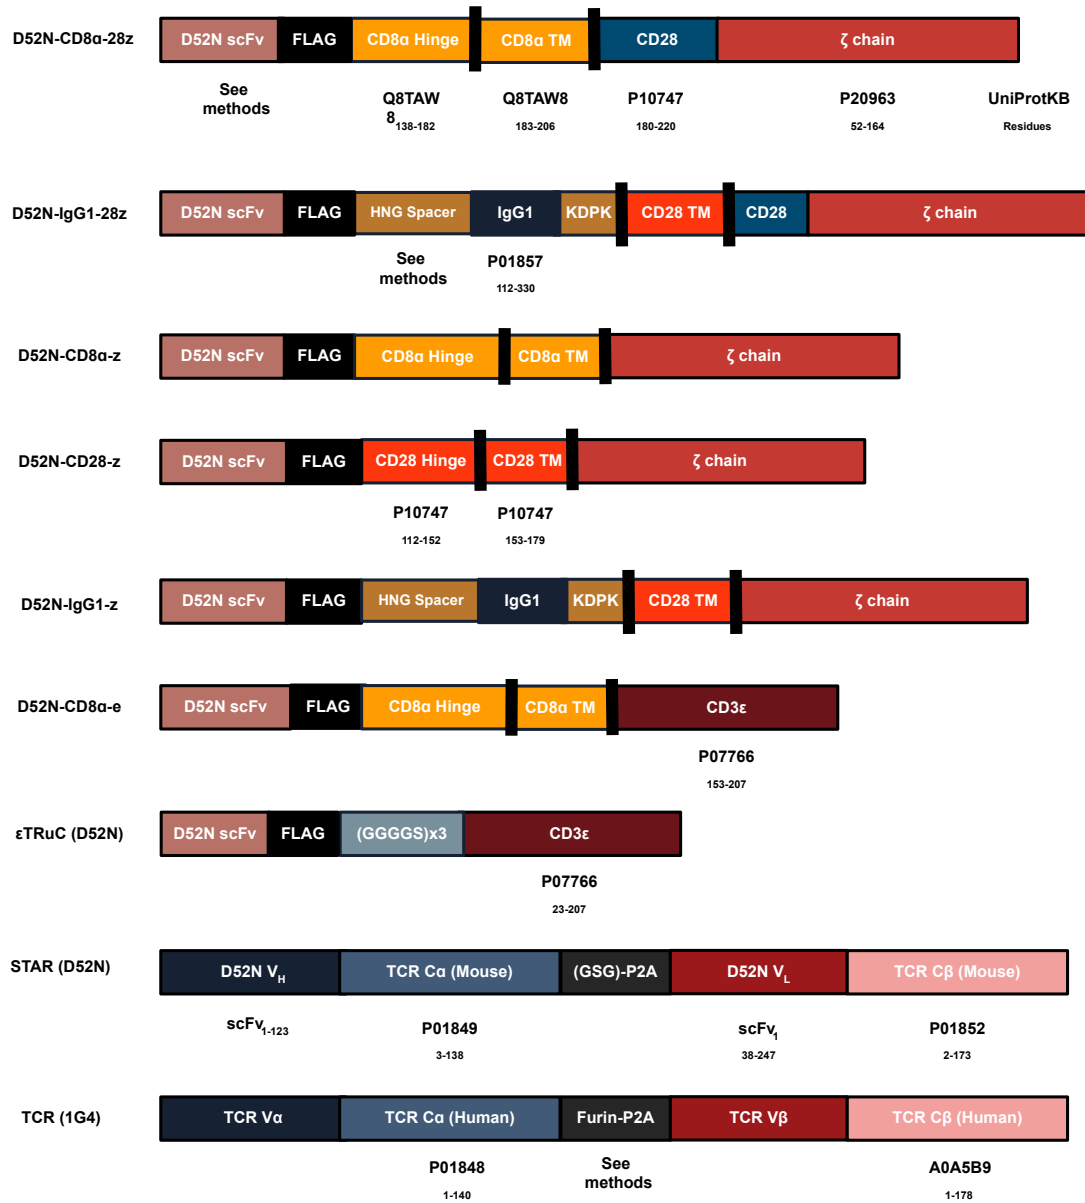

Figure S1: Schematic of antigen receptor architectures used in the study.

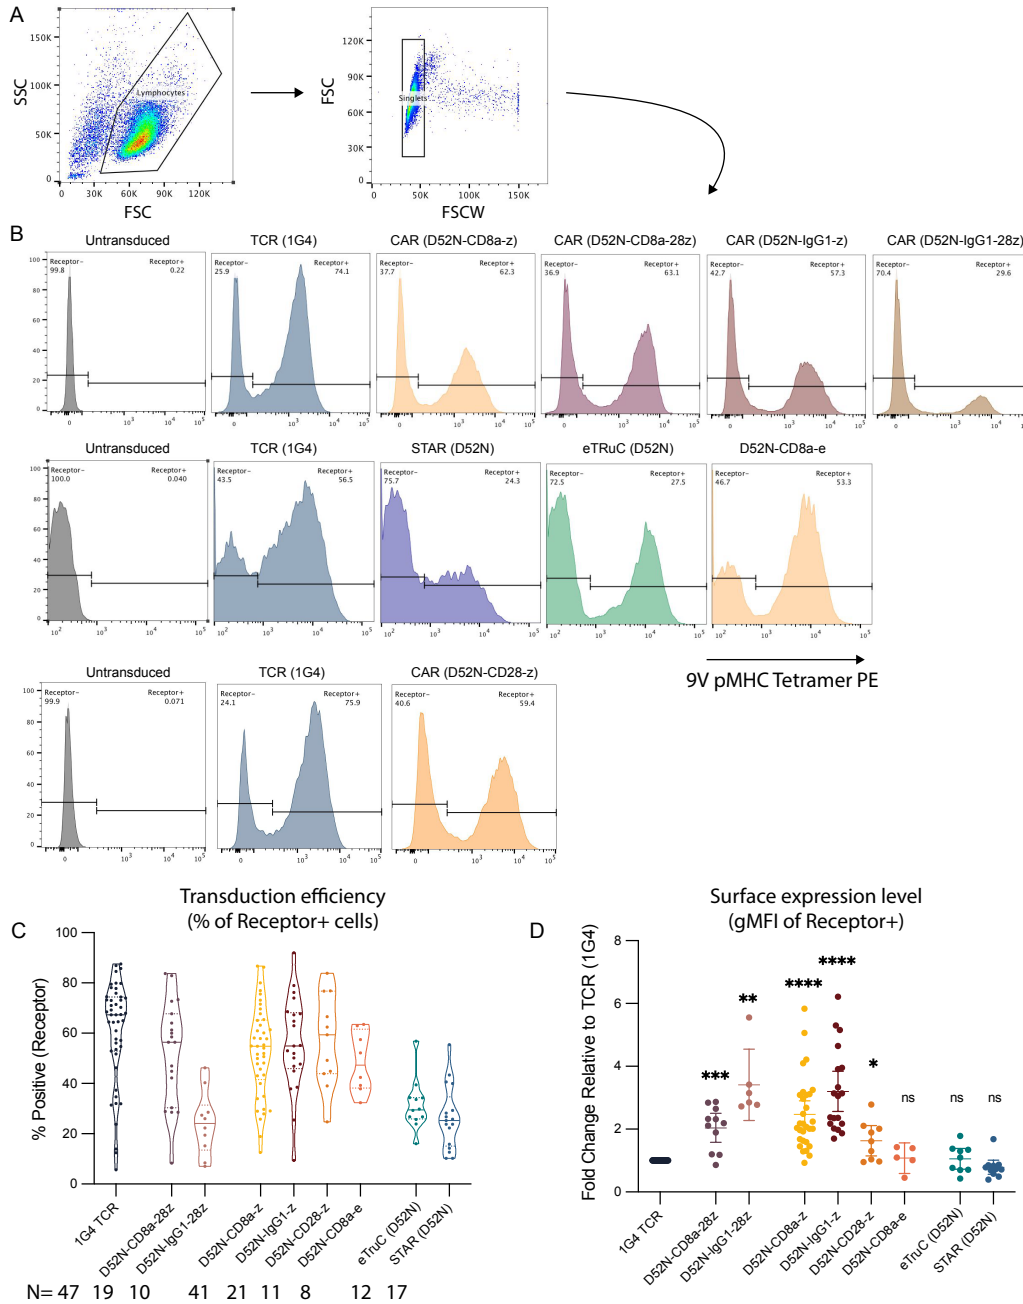

**Figure S2: Surface expression of chimeric receptors was similar or higher compared to the TCR.**

**(A)** Gating strategy to identify single lymphocytes. **(B)** Representative flow cytometry histograms showing surface expression of the indicated surface receptor using fluorescent 9V pMHC tetramers. Untransduced T cells are used to determine the negative gate. Each row is an independent experiment and each column is the indicated antigen receptor with the TCR being included in all experiments performed in the study. **(C)** The percent of T cells expressing the indicated receptor (i.e. within receptor positive gate). **(D)** The fold-change in the surface expression of each chimeric antigen receptor relative to the TCR determined by the gMFI of T cells in the receptor positive gate. The surface expression of each antigen receptor was determined for every experiment carried out in the study and is shown in aggregate in panel C and D. Individual data points for each antigen receptors represents an independent experiment (N is shown below the labels in panel C), which is generated by producing lentivirus and transducing a new sample of primary human T cells (see Methods). The TCR contains the largest number of experiments because it was included in every experiment. A one-sample t-test is used to compare each chimeric receptor to the expression of the TCR (1.0) on log-transformed values. Abbreviations: \* = p-value $\leq$ 0.05, \*\* = p-value $\leq$ 0.01, \*\*\* = p-value $\leq$ 0.001, \*\*\*\* = p-value $\leq$ 0.0001.

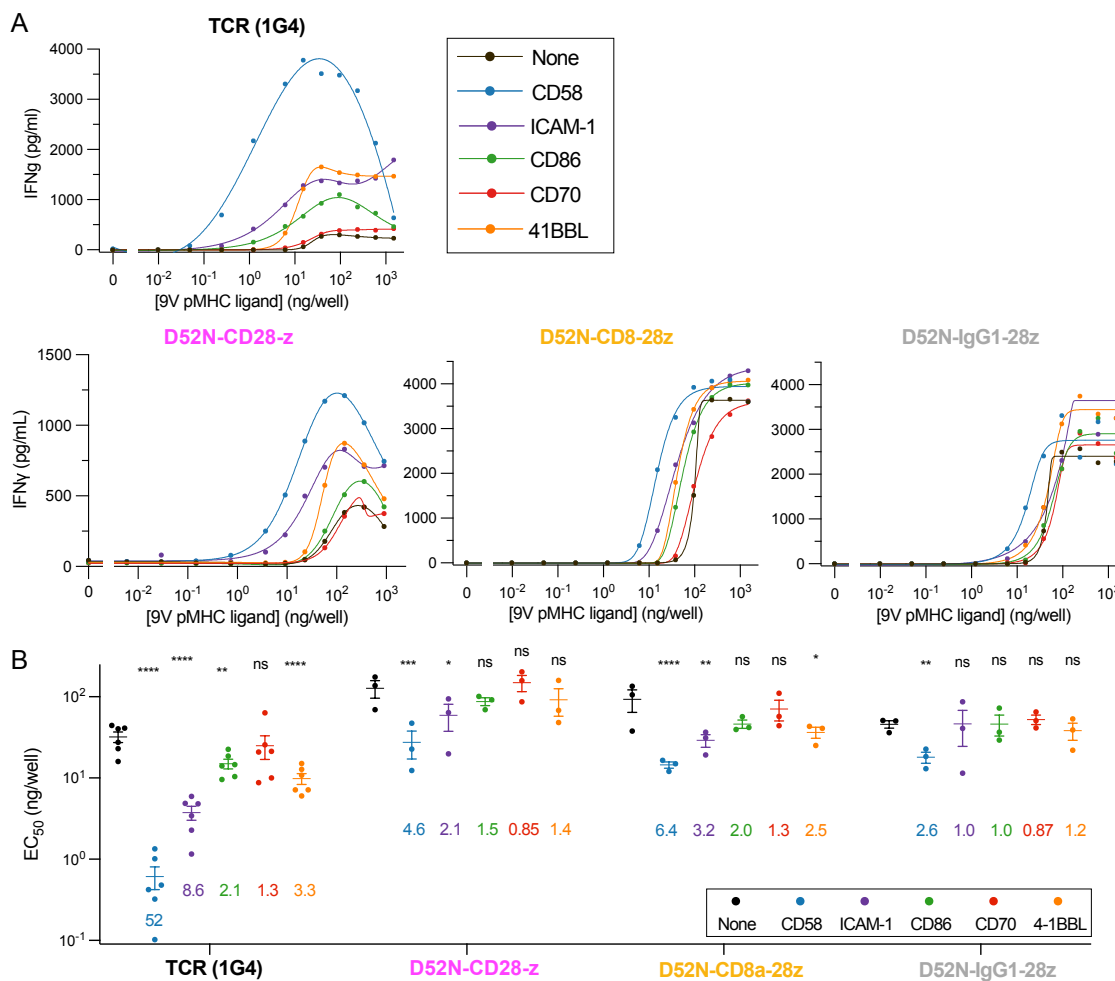

**Figure S3: Extended data for Figure 2 confirming that CARs are inefficient at exploiting adhesion receptors when measuring IFN $\gamma$  production. (A) Representative dose-responses using T cells expressing the indicated antigen receptor stimulated by a titration of purified pMHC alone ('None') or in combination with a fixed concentration of the indicated purified accessory receptor ligand (colours). The supernatant concentration of IFN $\gamma$  was determined after 24 hours using ELISA. Each dose-response curve was fitted to obtain the EC<sub>50</sub> and E<sub>max</sub> values. (B) The EC<sub>50</sub> values for the indicated antigen receptor and purified ligand. The coloured numbers indicate the fold-change in EC<sub>50</sub> induced by the addition of the indicated accessory receptor ligand relative to pMHC alone ('None'). The EC<sub>50</sub> values for each ligand are compared to the 'None' condition using a paired t-test on log-transformed data. (C) The fold-change in E<sub>max</sub> relative to pMHC alone ('None') for each antigen receptor and purified ligand. The fold-change is compared using a one-sample t-test to a hypothetical value of 0 on log-transformed data. Abbreviations: \* = p-value  $\leq$  0.05, \*\* = p-value  $\leq$  0.01, \*\*\* = p-value  $\leq$  0.001, \*\*\*\* = p-value  $\leq$  0.0001.**

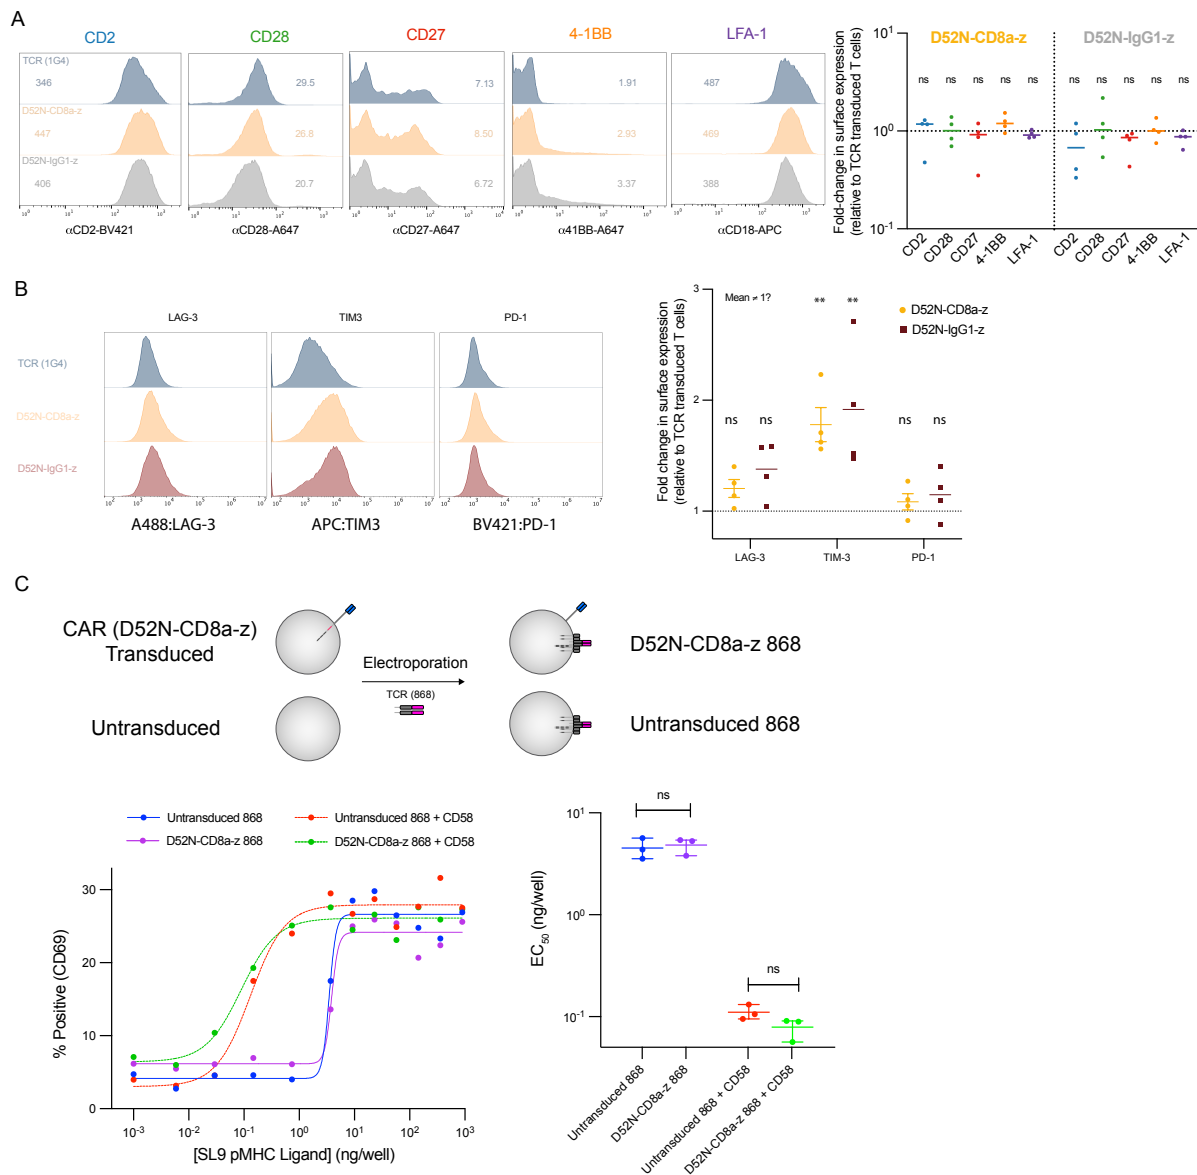

**Figure S4: The CAR antigen sensitivity defect is not a result of exhaustion induced by tonic signalling.** (A) Surface expression of the indicated co-stimulation receptors on T cells transduced with the TCR or the indicated CAR. Representative flow cytometry histograms (top) and fold-change across independent experiments (N=4, bottom). (B) Surface expression of the indicated co-inhibitory receptors on T cells transduced with the TCR or with the indicated CARs. Representative flow cytometry histograms (left) and fold-change across independent experiments (N=4, right). (C) CAR transduced or untransduced T cells are electroporated with the 868 TCR specific to the SL9 peptide antigen before being stimulated by purified SL9 pMHC with or without CD58. Representative dose-response (bottom left) and  $EC_{50}$  values across independent experiments (N=3, bottom right). A one-sample t-test is used to obtain a p-value for the null hypothesis that the indicated surface receptor expression differs from 1.0 on log-transformed values (panel A and panel B, right) and a two-sample t-test is used to compare log-transformed  $EC_{50}$  (panel C, bottom right). Abbreviations: \* = p-value  $\leq 0.05$ , \*\* = p-value  $\leq 0.01$ , \*\*\* = p-value  $\leq 0.001$ , \*\*\*\* = p-value  $\leq 0.0001$ .

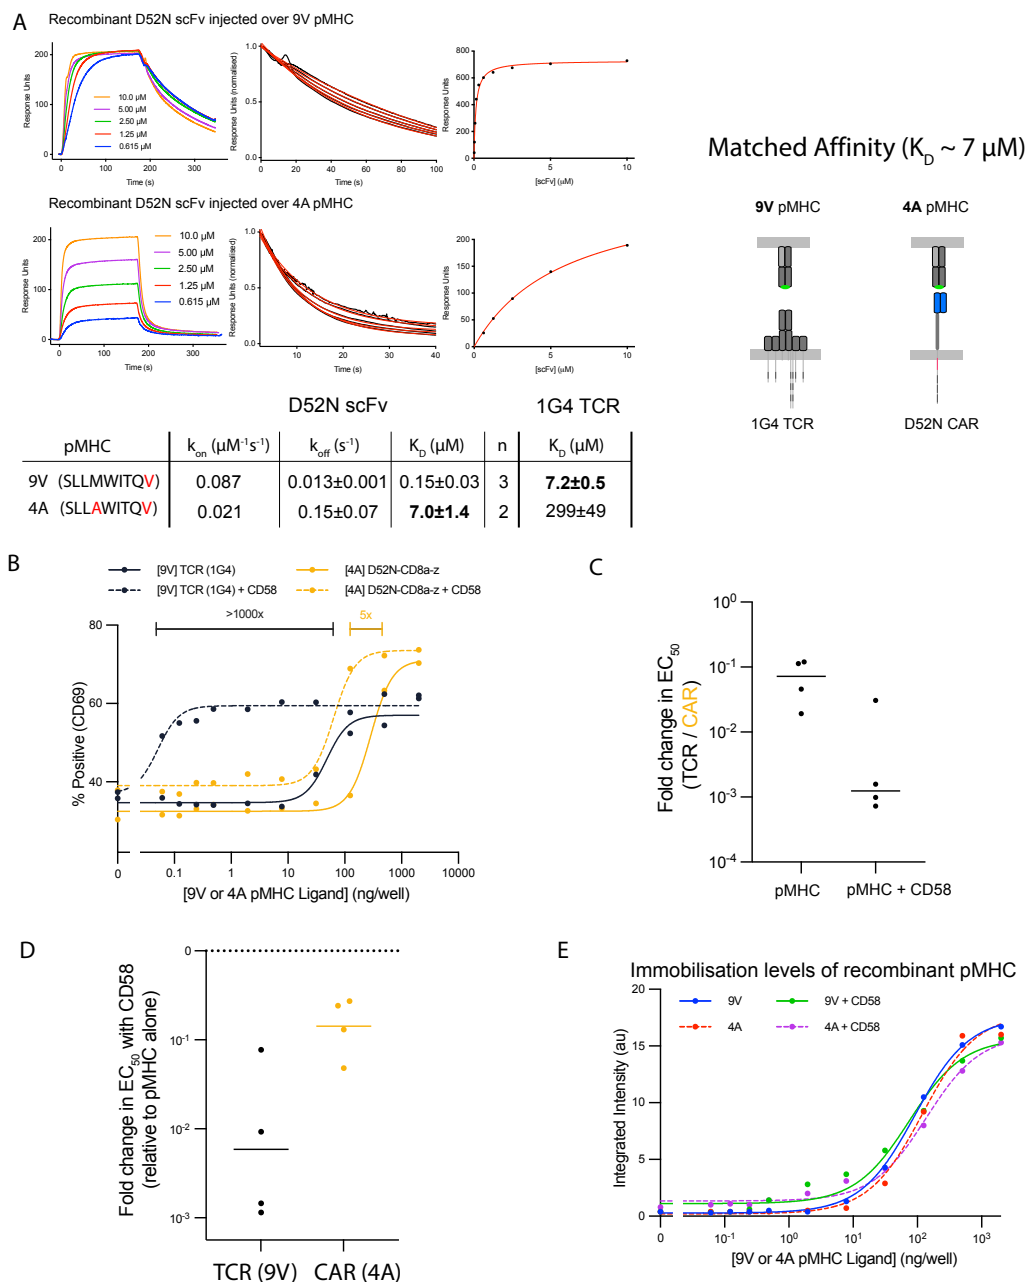

**Figure S5: Matching the antigen affinity of the TCR and CAR increases the antigen sensitivity defect of CARs.** (A) Binding between purified D52N scFv and the 9V (top) or 4A (bottom) pMHCs measured by surface plasmon resonance (SPR) showing the full sensogram (left), dissociation phase (middle) and steady state binding response (right). The kinetic  $k_{off}$  and equilibrium  $K_D$  are obtained by fitting the dissociation phase and steady-state binding response, respectively (red line is model fit). The kinetic  $k_{on}$  is derived from  $K_D$  and  $k_{off}$ . The  $K_D$  values for the TCR are obtained from previous work (32). (B) Representative dose-response for the TCR recognising the 9V pMHC and for the CAR recognising the 4A pMHC with (dashed line) or without (solid line) purified CD58 (250 ng/well). C-D Fold-change in  $EC_{50}$  between (C) the TCR recognising 9V and the CAR recognising 4A and (D) induced by the addition of CD58 for the indicated pMHC and antigen receptor across independent experiments (N=4). (E) Levels of presented pMHC and antigen receptor across independent experiments as detected by the conformationally sensitive W6/32 antibody.



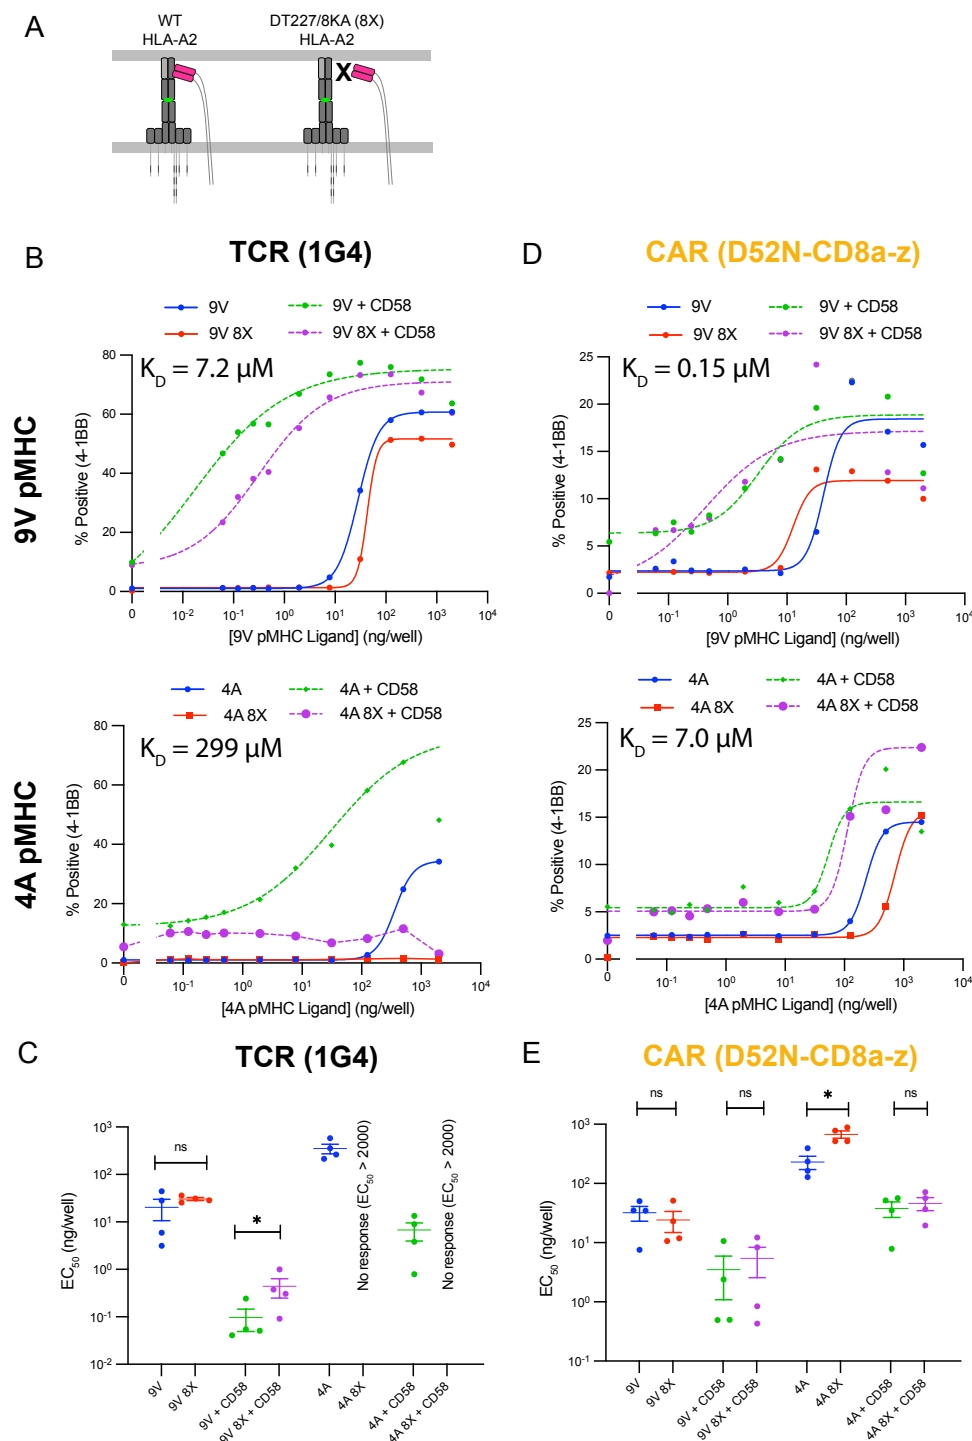

**Figure S6: The CAR antigen sensitivity defect is independent of the CD8 co-receptor.** (A) The DT227/8KA mutations in the HLA-A2 heavy-chain prevent binding by the CD8 co-receptor (referred to as 8X). (B-E) Representative dose-response curves (B,D) and summary measures across independent experiments ( $N=4$ ) (C,E) for the 9V and 4A pMHC variants with or without CD58 for the TCR (B,C) and the CAR (D,E). A t-test is used to compare the  $EC_{50}$  values on log-transformed data. Abbreviations: \* =  $p\text{-value} \leq 0.05$ , \*\* =  $p\text{-value} \leq 0.01$ , \*\*\* =  $p\text{-value} \leq 0.001$ , \*\*\*\* =  $p\text{-value} \leq 0.0001$ .

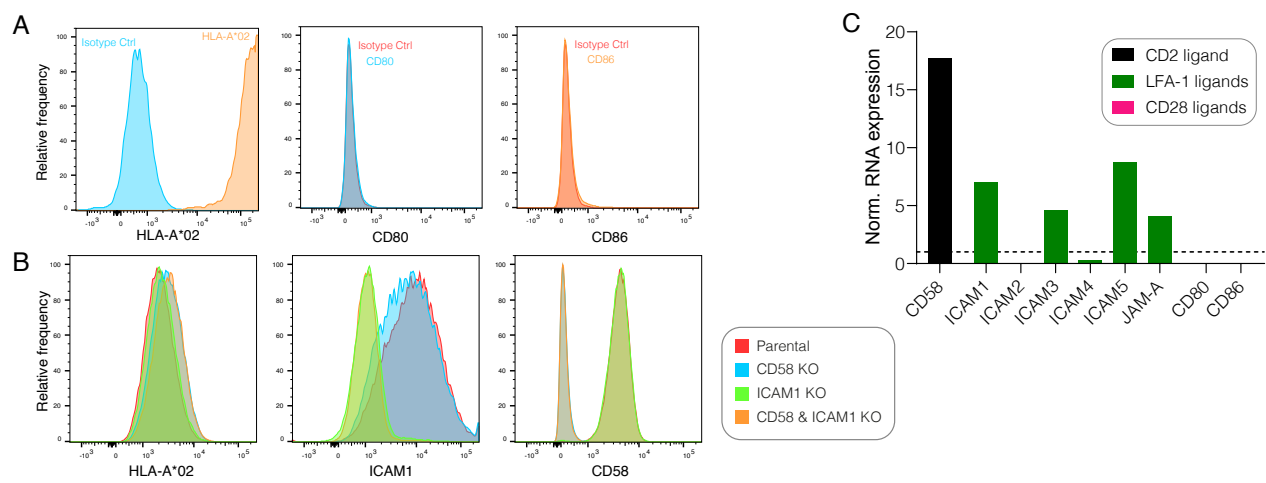

**Figure S7: Expression of accessory receptor ligands on the U87 glioblastoma cell line.** (A) Expression of HLA-A\*02 (left), CD80 (middle), and CD86 (right) on parental U87 cells. (B) Expression of HLA-A\*02 (left), ICAM-1 (middle), and CD58 (right) on the parental U87 cells or the indicated knockout cell lines. (C) Expression of the indicated molecule by RNA as reported in the Human Cell Atlas (77).

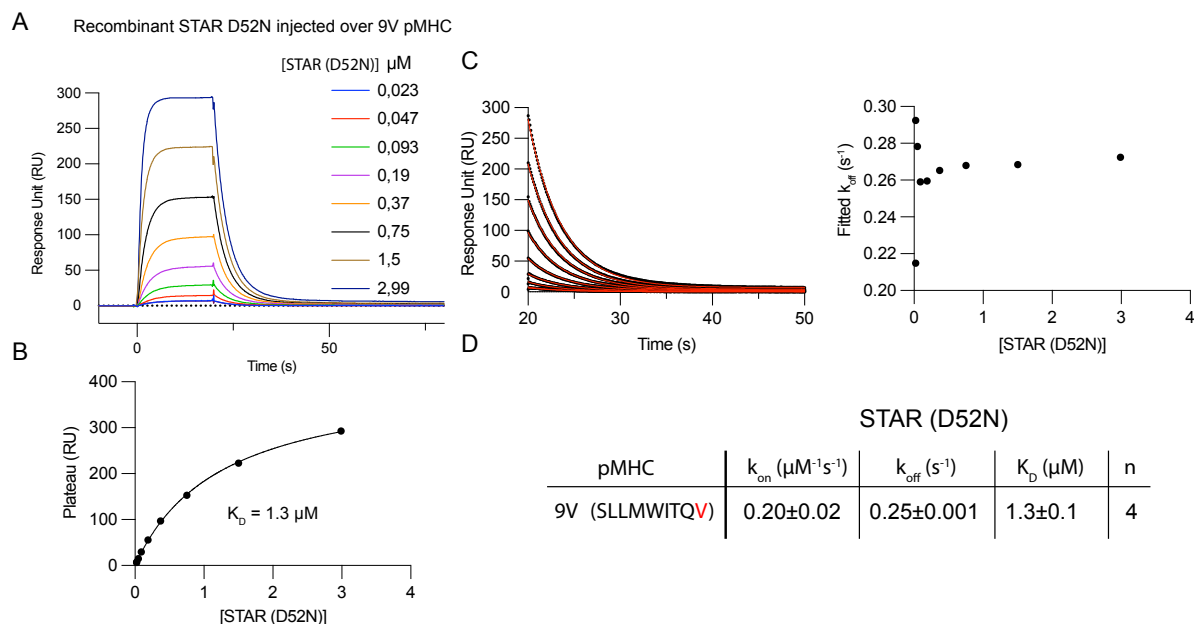

**Figure S8: The binding affinity and kinetics between recombinant STAR (D52N) and 9V pMHC. (A)** Representative binding between purified D52N STAR at the indicated concentration injected over a surface with immobilised 9V pMHC measured by surface plasmon resonance (SPR) showing the full sensogram. **(B)** The equilibrium  $K_D$  is obtained by fitting the steady-state response. **(C)** The kinetic  $k_{\text{off}}$  for each experiment is obtained by fitting the dissociation phase (left) and averaging the values for different concentrations (right). **(D)** Summary of binding constants with the kinetic  $k_{\text{on}}$  determined for each experiment using  $K_D$  and  $k_{\text{off}}$ .

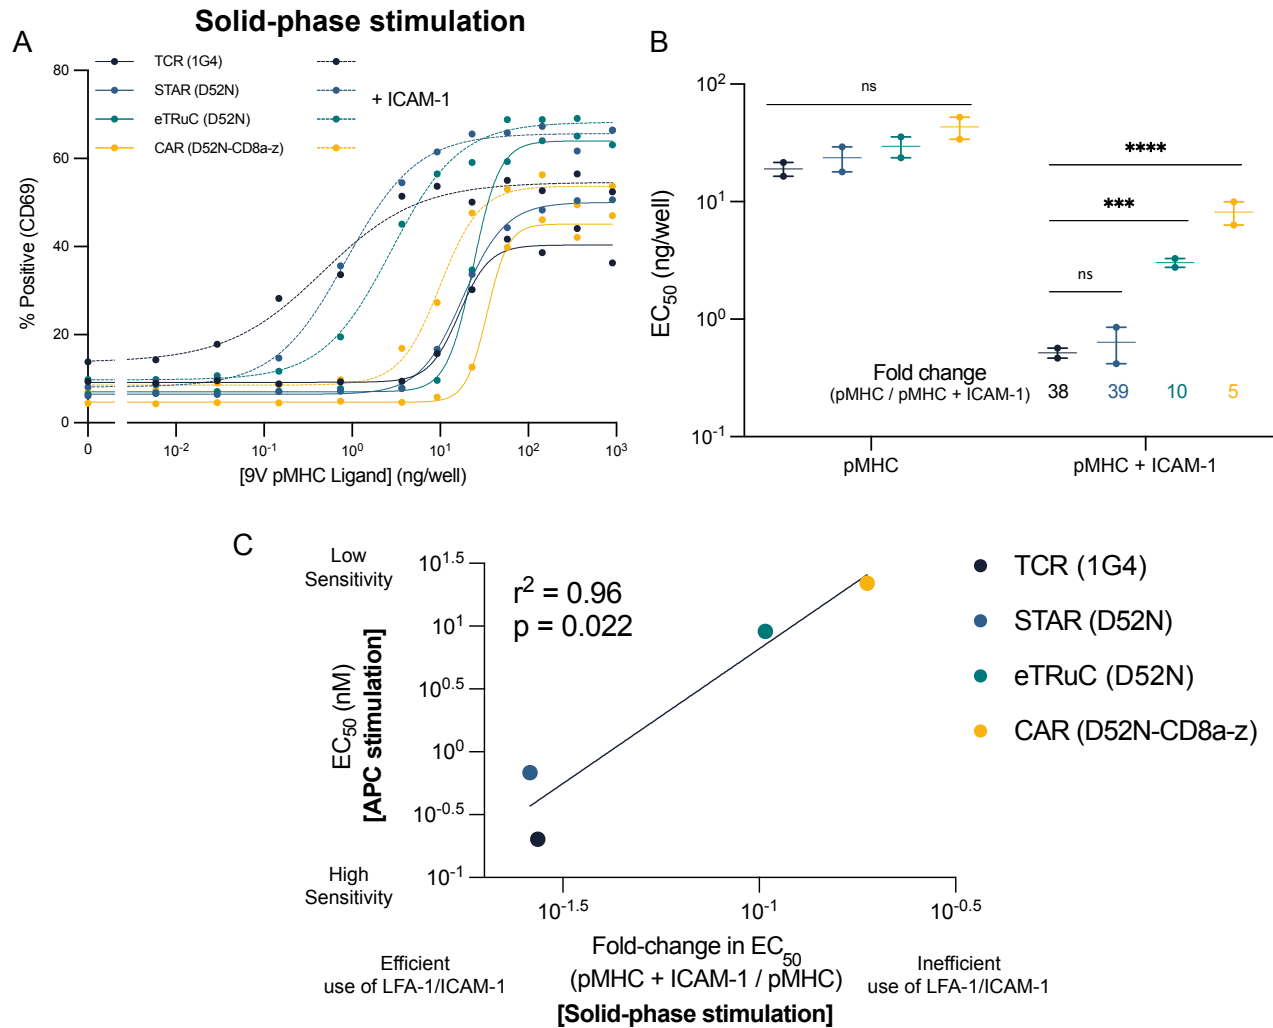

**Figure S9: The ability of TCR-like chimeric antigen receptors to recapitulate the sensitivity of the TCR depends on the efficiency with which they are able to exploit the LFA-1 adhesion interaction.** (A) T cells expressing the indicated antigen receptor were stimulated by a titration of purified pMHC alone (solid lines) or in combination with a fixed concentration of purified ICAM-1 (dashed lines). (B) Fitted  $EC_{50}$  values from two independent experiments. (C) The averaged  $EC_{50}$  values for CD69 upregulation from the APC stimulation assay (from Fig. 4C) are plotted over the averaged fold-change in  $EC_{50}$  for CD69 induced by the addition of ICAM-1 from the solid-phase stimulation assay (from panel B). The  $EC_{50}$  values are compared using a one-way ANOVA on log-transformed values (B). Abbreviations: \*\*\* =  $p$ -value  $\leq 0.001$ , \*\*\*\* =  $p$ -value  $\leq 0.0001$ .
